# Supplementary material for: Identification and Characterization of MicroRNAs from Tree Peony (Paeonia ostii) and Their Response to Copper Stress
Source: PLoS One. 2015 Feb 6;10(2):e0117584. doi: 10.1371/journal.pone.0117584 (PMC4319853; doi:10.1371/journal.pone.0117584)
Supplement: S6 Table — (XLS) [file pone.0117584.s007.xls]

## Sheet: CK
novel_mir_1
CK-m0001 CL10589.Contig7_All:1016:1200:- 185(nt) -69.90(kcal/mol)
AAAAGCCTAATAACCAGACACCCTTCCTTCTGCTAGAATGAAACCAGAACCAAATACCCAGATCCGACCCTAGATTCTAAATCCATACCACTGATGAAACATACAGATCATAATGAAATATCATATTTCTTGTTTCACAATTTTTGACAAGAGCAGAGGGAAGGGTGTCTGGTTATTAGGCAGAA CK-m0001 29
....((((((((((((((((((((((((((((((....((((((.((((..........(((..(.......)..)))............((((((...))).)))......((((....))))..)))).))))))((.....)).....))))))))))))))))))))))))))))))....
************ACCAGACACCCTTCCTTCTGC******************************************************************************************************************************************************** CK-m0001-5p 1
**********************************************************************************************************************************************************AGAGGGAAGGGTGTCTGGTTA********** CK-m0001-3p 27
------------ACCAGACACCCTTCCTTCTGC-------------------------------------------------------------------------------------------------------------------------------------------------------- t2208084 1
----------------------------------------------------------------------------------------------------------------------------------------------------------AGAGGGAAGGGTGTCTGGTTA---------- t0019724 27
----------------------------------------------------------------------------------------------------------------------------------------------------------------AAGGGTGTCTGGTTATTAGGC---- t1550650 1
//
novel_mir_2
CK-m0002 CL1169.Contig2_All:775:926:- 152(nt) -73.70(kcal/mol)
ACGCCCTCGCCCTCAGCCTGTCCGATTGAGGCATTTCCGAAACTGAAGCCGTAACTCTAGAAGATTTCTTTTCTCCCTCGGGTTACGACTTCAATTTCAAACAAAATGACTCGGAAATGTTTCAATCGGACATGCTGACAGCGTTCGGCACC CK-m0002 214
..(((..(((..(((((.((((((((((((((((((((((...(((((.((((((((.((.(((.......)))..)).)))))))).)))))...(((.......))).)))))))))))))))))))))).)))))..)))...)))...
********************TCCGATTGAGGCATTTCCGAA*************************************************************************************************************** CK-m0002-5p 151
***************************************************************************************************************CGGAAATGTTTCAATCGGACA******************** CK-m0002-3p 63
------------------TGTCCGATTGAGGCATTTCCG----------------------------------------------------------------------------------------------------------------- t0010104 53
-------------------GTCCGATTGAGGCATTTCCGA---------------------------------------------------------------------------------------------------------------- t0363500 2
--------------------TCCGATTGAGGCATTTCCGA---------------------------------------------------------------------------------------------------------------- t0080219 7
--------------------TCCGATTGAGGCATTTCCGAA--------------------------------------------------------------------------------------------------------------- t0005857 89
------------------------------------------------------------------------------------------------------------ACTCGGAAATGTTTCAATCGG----------------------- t2719581 1
------------------------------------------------------------------------------------------------------------ACTCGGAAATGTTTCAATCGGACA-------------------- t2857847 1
--------------------------------------------------------------------------------------------------------------TCGGAAATGTTTCAATCGGAC--------------------- t1390891 1
---------------------------------------------------------------------------------------------------------------CGGAAATGTTTCAATCGGACA-------------------- t0009197 58
----------------------------------------------------------------------------------------------------------------GGAAATGTTTCAATCGGACA-------------------- t1845787 1
----------------------------------------------------------------------------------------------------------------GGAAATGTTTCAATCGGACATGC----------------- t2783226 1
//
novel_mir_3
CK-m0003 CL1240.Contig1_All:824:993:- 170(nt) -81.80(kcal/mol)
CCCTCTCTAGCAATGGCGGAAGAGTGCAATGCATGAAGATAATCTTATGAAGTCAATGGGACTGCACGTTAACCCTGTGAAGCTGTTCAGGGTTGTATGCTGTTAAATTGCAACTAAAATATGGGATTGTTATATGCATTTGCACTCTTCCGCCAATGCTACAGAGAGAA CK-m0003 15
..((((((((((.((((((((((((((((((((((..((((((((((((.(((((((..(((.(((...((((((((..........))))))))..))).)))..))))..)))....)))))))))))).)))))).)))))))))))))))).))))..))))))..
**********CAATGGCGGAAGAGTGCAATG******************************************************************************************************************************************* CK-m0003-5p 14
******************************************************************************************************************************************TTTGCACTCTTCCGCCAATGCT********** CK-m0003-3p 1
----------CAATGGCGGAAGAGTGCAATG------------------------------------------------------------------------------------------------------------------------------------------- t0107030 5
----------CAATGGCGGAAGAGTGCAATGC------------------------------------------------------------------------------------------------------------------------------------------ t0144877 4
-----------AATGGCGGAAGAGTGCAATG------------------------------------------------------------------------------------------------------------------------------------------- t0318872 2
-----------AATGGCGGAAGAGTGCAATGC------------------------------------------------------------------------------------------------------------------------------------------ t1941752 1
------------ATGGCGGAAGAGTGCAATG------------------------------------------------------------------------------------------------------------------------------------------- t2180551 1
------------ATGGCGGAAGAGTGCAATGC------------------------------------------------------------------------------------------------------------------------------------------ t1222080 1
-------------------------------------------------------------------------------------------------------------------------------------------TTGCACTCTTCCGCCAATGCT---------- t1800823 1
//
novel_mir_3
CK-m0004 CL1240.Contig4_All:824:1129:- 306(nt) -103.50(kcal/mol)
CCCTCTCTAGCAATGGCGGAAGAGTGCAATGCATGAAGGTATATATTTATCCGCTTTGAACATGCAAAAAGTTAGAATTGGTCGATATAACTAGTAGGATTATGCACCAAGTCTATTGTCAATCTATACTATTATAAATGCTTCAGTAGTTGTAATTTTGAATTGTGATGGCAGATAATCTTATGAAGTCAATGGGACTGCACGTTAACCCTGTGAAGCTGTTCAGGGTTGTATGCTGTTAAATTGCAACTAAAATATGGGATTGTTATATGCATTTGCACTCTTCCGCCAATGCTACAGAGAGAA CK-m0004 16
..((((((((((.((((((((((((((((((((((..((((......)))).(((....(((..((((....((((.(((((.(.(((((((....)).))))))))))).))))...............(((((((.(((....))).)))))))))))...)))...))).((((((((((((.(((((((..(((.(((...((((((((..........))))))))..))).)))..))))..)))....)))))))))))).)))))).)))))))))))))))).))))..))))))..
**********CAATGGCGGAAGAGTGCAATG*********************************************************************************************************************************************************************************************************************************************************************************** CK-m0004-5p 14
**********************************************************************************************************************************************************************************************************************************************************************************TTTGCACTCTTCCGCCAATGCT********** CK-m0004-3p 1
----------CAATGGCGGAAGAGTGCAATG--------------------------------------------------------------------------------------------------------------------------------------------------------------------------------------------------------------------------------
----------CAATGGCGGAAGAGTGCAATGC-------------------------------------------------------------------------------------------------------------------------------------------------------------------------------------------------------------------------------
-----------AATGGCGGAAGAGTGCAATG--------------------------------------------------------------------------------------------------------------------------------------------------------------------------------------------------------------------------------
-----------AATGGCGGAAGAGTGCAATGC-------------------------------------------------------------------------------------------------------------------------------------------------------------------------------------------------------------------------------
------------ATGGCGGAAGAGTGCAATG--------------------------------------------------------------------------------------------------------------------------------------------------------------------------------------------------------------------------------
------------ATGGCGGAAGAGTGCAATGC-------------------------------------------------------------------------------------------------------------------------------------------------------------------------------------------------------------------------------
------------------------------------------------------------------------------------------------------------------------------------------------------------TTTGAATTGTGATGGCAGATA------------------------------------------------------------------------------
---------------------------------------------------------------------------------------------------------------------------------------------------------------------------------------------------------------------------------------------------------------
//
novel_mir_4
CK-m0005 CL1436.Contig1_All:79:187:+ 109(nt) -42.70(kcal/mol)
GTGTATTTGTTTAATCATTAGAAACGTGGTGTCCGGTAGCAGATCGAAGAAATTTTAAGCTTTGGATTTTCTCCCCGGCTATCGCGTTTCTTTGATTAAACAGATAACT CK-m0005 71
...((((((((((((((..((((((((((((.((((.((.(((((((((..........)))).))))).))..)))).)))))))))))).))))))))))))))...
**********TTAATCATTAGAAACGTGGTGT***************************************************************************** CK-m0005-5p 69
********************************************************************************ATCGCGTTTCTTTGATTAAAC******** CK-m0005-3p 1
----------TTAATCATTAGAAACGTGGT------------------------------------------------------------------------------- t1401935 1
----------TTAATCATTAGAAACGTGGTG------------------------------------------------------------------------------ t1257818 1
----------TTAATCATTAGAAACGTGGTGT----------------------------------------------------------------------------- t0008284 64
----------TTAATCATTAGAAACGTGGTGTC---------------------------------------------------------------------------- t1873382 1
-----------TAATCATTAGAAACGTGGTGTC---------------------------------------------------------------------------- t0277879 2
-----------------------------TGTCCGGTAGCAGATCGAAGA----------------------------------------------------------- t1884146 1
--------------------------------------------------------------------------------ATCGCGTTTCTTTGATTAAAC-------- t1901416 1
//
novel_mir_5
CK-m0006 CL2152.Contig1_All:729:810:+ 82(nt) -23.30(kcal/mol)
CAGAAATGAGTTGGCCATCTGAGTGACATTACGTTGAACATTTGAGTCTGAGCCTAATCCTCAGATGACCAGATCATTGAAC CK-m0006 586
....(((((.((((.((((((((.((..(((.(((.(((......)).).))).))))))))))))).)))).)))))....
**********TTGGCCATCTGAGTGACATTA*************************************************** CK-m0006-5p 568
CAGAAATGAGTTGGCCATCTG------------------------------------------------------------- t0153900 4
----------TTGGCCATCTGAGTGACATT---------------------------------------------------- t0112488 5
----------TTGGCCATCTGAGTGACATTA--------------------------------------------------- t0000767 533
----------TTGGCCATCTGAGTGACATTAC-------------------------------------------------- t0026212 20
----------TTGGCCATCTGAGTGACATTACGT------------------------------------------------ t0756366 1
-----------TGGCCATCTGAGTGACATT---------------------------------------------------- t2915928 1
-----------TGGCCATCTGAGTGACATTA--------------------------------------------------- t2252464 1
-----------TGGCCATCTGAGTGACATTAC-------------------------------------------------- t0086345 6
-----------TGGCCATCTGAGTGACATTACG------------------------------------------------- t1347289 1
-----------------TCTGAGTGACATTACGTTGAAC------------------------------------------- t0179802 3
------------------CTGAGTGACATTACGTTGAACA------------------------------------------ t0585565 1
-------------------TGAGTGACATTACGTTGAACA------------------------------------------ t0365675 2
--------------------------CATTACGTTGAACATTTGAGT----------------------------------- t0539285 1
-----------------------------TACGTTGAACATTTGAGTCTGA------------------------------- t1218588 1
---------------------------------TTGAACATTTGAGTCTGAGCC---------------------------- t1038405 1
------------------------------------AACATTTGAGTCTGAGCCTAAT------------------------ t2381993 1
------------------------------------AACATTTGAGTCTGAGCCTAATCC---------------------- t0639113 1
---------------------------------------------------GCCTAATCCTCAGATGACCAG---------- t0319167 2
----------------------------------------------------CCTAATCCTCAGATGACCAGA--------- t2030701 1
//
novel_mir_6
CK-m0007 CL2152.Contig1_All:726:809:- 84(nt) -29.40(kcal/mol)
TTCAATGATCTGGTCATCTGAGGATTAGGCTCAGACTCAAATGTTCAACGTAATGTCACTCAGATGGCCAACTCATTTCTGAAG CK-m0007 982
((((((((..(((((((((((((((...((...(((......)))....))...))).))))))))))))..))))...)))).
**********TGGTCATCTGAGGATTAGGCT***************************************************** CK-m0007-5p 956
**************************************************TAATGTCACTCAGATGGCCAAC************ CK-m0007-3p 12
--CAATGATCTGGTCATCTGAGGA------------------------------------------------------------ t0416456 2
---AATGATCTGGTCATCTGAGGAT----------------------------------------------------------- t1001187 1
----ATGATCTGGTCATCTGAGGAT----------------------------------------------------------- t1450033 1
----ATGATCTGGTCATCTGAGGATT---------------------------------------------------------- t0491719 1
-----TGATCTGGTCATCTGAGGATT---------------------------------------------------------- t0319067 2
------GATCTGGTCATCTGAGGATTAGG------------------------------------------------------- t2123553 1
-------ATCTGGTCATCTGAGGATTAG-------------------------------------------------------- t0298957 2
---------CTGGTCATCTGAGGATTAGGC------------------------------------------------------ t0063697 8
---------CTGGTCATCTGAGGATTAGGCT----------------------------------------------------- t0070277 8
----------TGGTCATCTGAGGATTAGGC------------------------------------------------------ t0101891 5
----------TGGTCATCTGAGGATTAGGCT----------------------------------------------------- t0000392 923
----------TGGTCATCTGAGGATTAGGCTC---------------------------------------------------- t0088120 6
-----------GGTCATCTGAGGATTAGGCTC---------------------------------------------------- t0137448 4
-----------------CTGAGGATTAGGCTCAGACTCA--------------------------------------------- t2669593 1
------------------TGAGGATTAGGCTCAGACTCAA-------------------------------------------- t1643587 1
-----------------------------------------------------TGTCACTCAGATGGCCAACTC---------- t0128768 4
-----------------------------------------------------TGTCACTCAGATGGCCAACTCA--------- t0079051 7
-----------------------------------------------------TGTCACTCAGATGGCCAACTCAT-------- t2718235 1
------------------------------------------------------GTCACTCAGATGGCCAACTCAT-------- t0349933 2
-------------------------------------------------------TCACTCAGATGGCCAACTCATT------- t1108844 1
----------------------------------------------------------CTCAGATGGCCAACTCATTTC----- t0597574 1
//
novel_mir_5
CK-m0008 CL2152.Contig2_All:340:421:+ 82(nt) -23.30(kcal/mol)
CAGAAATGAGTTGGCCATCTGAGTGACATTACGTTGAACATTTGAGTCTGAGCCTAATCCTCAGATGACCAGATCATTGAAC CK-m0008 586
....(((((.((((.((((((((.((..(((.(((.(((......)).).))).))))))))))))).)))).)))))....
**********TTGGCCATCTGAGTGACATTA*************************************************** CK-m0008-5p 568
CAGAAATGAGTTGGCCATCTG------------------------------------------------------------- t0153900 4
----------TTGGCCATCTGAGTGACATT---------------------------------------------------- t0112488 5
----------TTGGCCATCTGAGTGACATTA--------------------------------------------------- t0000767 533
----------TTGGCCATCTGAGTGACATTAC-------------------------------------------------- t0026212 20
----------TTGGCCATCTGAGTGACATTACGT------------------------------------------------ t0756366 1
-----------TGGCCATCTGAGTGACATT---------------------------------------------------- t2915928 1
-----------TGGCCATCTGAGTGACATTA--------------------------------------------------- t2252464 1
-----------TGGCCATCTGAGTGACATTAC-------------------------------------------------- t0086345 6
-----------TGGCCATCTGAGTGACATTACG------------------------------------------------- t1347289 1
-----------------TCTGAGTGACATTACGTTGAAC------------------------------------------- t0179802 3
------------------CTGAGTGACATTACGTTGAACA------------------------------------------ t0585565 1
-------------------TGAGTGACATTACGTTGAACA------------------------------------------ t0365675 2
--------------------------CATTACGTTGAACATTTGAGT----------------------------------- t0539285 1
-----------------------------TACGTTGAACATTTGAGTCTGA------------------------------- t1218588 1
---------------------------------TTGAACATTTGAGTCTGAGCC---------------------------- t1038405 1
------------------------------------AACATTTGAGTCTGAGCCTAAT------------------------ t2381993 1
------------------------------------AACATTTGAGTCTGAGCCTAATCC---------------------- t0639113 1
---------------------------------------------------GCCTAATCCTCAGATGACCAG---------- t0319167 2
----------------------------------------------------CCTAATCCTCAGATGACCAGA--------- t2030701 1
//
novel_mir_6
CK-m0009 CL2152.Contig2_All:337:420:- 84(nt) -29.40(kcal/mol)
TTCAATGATCTGGTCATCTGAGGATTAGGCTCAGACTCAAATGTTCAACGTAATGTCACTCAGATGGCCAACTCATTTCTGAAG CK-m0009 982
((((((((..(((((((((((((((...((...(((......)))....))...))).))))))))))))..))))...)))).
**********TGGTCATCTGAGGATTAGGCT***************************************************** CK-m0009-5p 956
**************************************************TAATGTCACTCAGATGGCCAAC************ CK-m0009-3p 12
--CAATGATCTGGTCATCTGAGGA------------------------------------------------------------ t0416456 2
---AATGATCTGGTCATCTGAGGAT----------------------------------------------------------- t1001187 1
----ATGATCTGGTCATCTGAGGAT----------------------------------------------------------- t1450033 1
----ATGATCTGGTCATCTGAGGATT---------------------------------------------------------- t0491719 1
-----TGATCTGGTCATCTGAGGATT---------------------------------------------------------- t0319067 2
------GATCTGGTCATCTGAGGATTAGG------------------------------------------------------- t2123553 1
-------ATCTGGTCATCTGAGGATTAG-------------------------------------------------------- t0298957 2
---------CTGGTCATCTGAGGATTAGGC------------------------------------------------------ t0063697 8
---------CTGGTCATCTGAGGATTAGGCT----------------------------------------------------- t0070277 8
----------TGGTCATCTGAGGATTAGGC------------------------------------------------------ t0101891 5
----------TGGTCATCTGAGGATTAGGCT----------------------------------------------------- t0000392 923
----------TGGTCATCTGAGGATTAGGCTC---------------------------------------------------- t0088120 6
-----------GGTCATCTGAGGATTAGGCTC---------------------------------------------------- t0137448 4
-----------------CTGAGGATTAGGCTCAGACTCA--------------------------------------------- t2669593 1
------------------TGAGGATTAGGCTCAGACTCAA-------------------------------------------- t1643587 1
-----------------------------------------------------TGTCACTCAGATGGCCAACTC---------- t0128768 4
-----------------------------------------------------TGTCACTCAGATGGCCAACTCA--------- t0079051 7
-----------------------------------------------------TGTCACTCAGATGGCCAACTCAT-------- t2718235 1
------------------------------------------------------GTCACTCAGATGGCCAACTCAT-------- t0349933 2
-------------------------------------------------------TCACTCAGATGGCCAACTCATT------- t1108844 1
----------------------------------------------------------CTCAGATGGCCAACTCATTTC----- t0597574 1
//
novel_mir_5
CK-m0010 CL2152.Contig3_All:260:341:+ 82(nt) -23.30(kcal/mol)
CAGAAATGAGTTGGCCATCTGAGTGACATTACGTTGAACATTTGAGTCTGAGCCTAATCCTCAGATGACCAGATCATTGAAC CK-m0010 586
....(((((.((((.((((((((.((..(((.(((.(((......)).).))).))))))))))))).)))).)))))....
**********TTGGCCATCTGAGTGACATTA*************************************************** CK-m0010-5p 568
CAGAAATGAGTTGGCCATCTG------------------------------------------------------------- t0153900 4
----------TTGGCCATCTGAGTGACATT---------------------------------------------------- t0112488 5
----------TTGGCCATCTGAGTGACATTA--------------------------------------------------- t0000767 533
----------TTGGCCATCTGAGTGACATTAC-------------------------------------------------- t0026212 20
----------TTGGCCATCTGAGTGACATTACGT------------------------------------------------ t0756366 1
-----------TGGCCATCTGAGTGACATT---------------------------------------------------- t2915928 1
-----------TGGCCATCTGAGTGACATTA--------------------------------------------------- t2252464 1
-----------TGGCCATCTGAGTGACATTAC-------------------------------------------------- t0086345 6
-----------TGGCCATCTGAGTGACATTACG------------------------------------------------- t1347289 1
-----------------TCTGAGTGACATTACGTTGAAC------------------------------------------- t0179802 3
------------------CTGAGTGACATTACGTTGAACA------------------------------------------ t0585565 1
-------------------TGAGTGACATTACGTTGAACA------------------------------------------ t0365675 2
--------------------------CATTACGTTGAACATTTGAGT----------------------------------- t0539285 1
-----------------------------TACGTTGAACATTTGAGTCTGA------------------------------- t1218588 1
---------------------------------TTGAACATTTGAGTCTGAGCC---------------------------- t1038405 1
------------------------------------AACATTTGAGTCTGAGCCTAAT------------------------ t2381993 1
------------------------------------AACATTTGAGTCTGAGCCTAATCC---------------------- t0639113 1
---------------------------------------------------GCCTAATCCTCAGATGACCAG---------- t0319167 2
----------------------------------------------------CCTAATCCTCAGATGACCAGA--------- t2030701 1
//
novel_mir_6
CK-m0011 CL2152.Contig3_All:257:340:- 84(nt) -29.40(kcal/mol)
TTCAATGATCTGGTCATCTGAGGATTAGGCTCAGACTCAAATGTTCAACGTAATGTCACTCAGATGGCCAACTCATTTCTGAAG CK-m0011 982
((((((((..(((((((((((((((...((...(((......)))....))...))).))))))))))))..))))...)))).
**********TGGTCATCTGAGGATTAGGCT***************************************************** CK-m0011-5p 956
**************************************************TAATGTCACTCAGATGGCCAAC************ CK-m0011-3p 12
--CAATGATCTGGTCATCTGAGGA------------------------------------------------------------ t0416456 2
---AATGATCTGGTCATCTGAGGAT----------------------------------------------------------- t1001187 1
----ATGATCTGGTCATCTGAGGAT----------------------------------------------------------- t1450033 1
----ATGATCTGGTCATCTGAGGATT---------------------------------------------------------- t0491719 1
-----TGATCTGGTCATCTGAGGATT---------------------------------------------------------- t0319067 2
------GATCTGGTCATCTGAGGATTAGG------------------------------------------------------- t2123553 1
-------ATCTGGTCATCTGAGGATTAG-------------------------------------------------------- t0298957 2
---------CTGGTCATCTGAGGATTAGGC------------------------------------------------------ t0063697 8
---------CTGGTCATCTGAGGATTAGGCT----------------------------------------------------- t0070277 8
----------TGGTCATCTGAGGATTAGGC------------------------------------------------------ t0101891 5
----------TGGTCATCTGAGGATTAGGCT----------------------------------------------------- t0000392 923
----------TGGTCATCTGAGGATTAGGCTC---------------------------------------------------- t0088120 6
-----------GGTCATCTGAGGATTAGGCTC---------------------------------------------------- t0137448 4
-----------------CTGAGGATTAGGCTCAGACTCA--------------------------------------------- t2669593 1
------------------TGAGGATTAGGCTCAGACTCAA-------------------------------------------- t1643587 1
-----------------------------------------------------TGTCACTCAGATGGCCAACTC---------- t0128768 4
-----------------------------------------------------TGTCACTCAGATGGCCAACTCA--------- t0079051 7
-----------------------------------------------------TGTCACTCAGATGGCCAACTCAT-------- t2718235 1
------------------------------------------------------GTCACTCAGATGGCCAACTCAT-------- t0349933 2
-------------------------------------------------------TCACTCAGATGGCCAACTCATT------- t1108844 1
----------------------------------------------------------CTCAGATGGCCAACTCATTTC----- t0597574 1
//
novel_mir_7
CK-m0012 CL2740.Contig7_All:48:145:+ 98(nt) -22.86(kcal/mol)
TAAAGCGAATTCTTTAGGGTTCGGTGTTTAGATTTTTGGTTCGGATTGCTGTCTTCATTCTATTTTTGGTAGTTCGACCGCGGAATTTATTTGTTTCT CK-m0012 20330
.....(((((((....))))))).....((((((((((((.((((((((((...............)))))))))))))).)))))))).........
*******************************************************************GGTAGTTCGACCGCGGAATTT********** CK-m0012-3p 20328
-------------------------GTTTAGATTTTTGGTTCGGAT---------------------------------------------------- t2216807 1
--------------------------TTTAGATTTTTGGTTCGGA----------------------------------------------------- t1414250 1
------------------------------------------------------------------TGGTAGTTCGACCGCGGAAT------------ t1292231 1
------------------------------------------------------------------TGGTAGTTCGACCGCGGAATT----------- t2849093 1
------------------------------------------------------------------TGGTAGTTCGACCGCGGAATTT---------- t0168102 3
------------------------------------------------------------------TGGTAGTTCGACCGCGGAATTTA--------- t0198130 3
------------------------------------------------------------------TGGTAGTTCGACCGCGGAATTTAT-------- t0870649 1
-------------------------------------------------------------------GGTAGTTCGACCGCGGAA------------- t0050355 11
-------------------------------------------------------------------GGTAGTTCGACCGCGGAAT------------ t0000285 1150
-------------------------------------------------------------------GGTAGTTCGACCGCGGAATT----------- t0000043 6122
-------------------------------------------------------------------GGTAGTTCGACCGCGGAATTT---------- t0000036 6918
-------------------------------------------------------------------GGTAGTTCGACCGCGGAATTTA--------- t0000058 4702
-------------------------------------------------------------------GGTAGTTCGACCGCGGAATTTAT-------- t0000299 1107
-------------------------------------------------------------------GGTAGTTCGACCGCGGAATTTATT------- t0002302 209
-------------------------------------------------------------------GGTAGTTCGACCGCGGAATTTATTT------ t0005440 95
--------------------------------------------------------------------GTAGTTCGACCGCGGAATTT---------- t0188472 3
--------------------------------------------------------------------GTAGTTCGACCGCGGAATTTA--------- t1772291 1
--------------------------------------------------------------------GTAGTTCGACCGCGGAATTTAT-------- t1103860 1
//
novel_mir_7
CK-m0013 CL2740.Contig8_All:48:145:+ 98(nt) -22.86(kcal/mol)
TAAAGCGAATTCTTTAGGGTTCGGTGTTTAGATTTTTGGTTCGGATTGCTGTCTTCATTCTATTTTTGGTAGTTCGACCGCGGAATTTATTTGTTTCT CK-m0013 20330
.....(((((((....))))))).....((((((((((((.((((((((((...............)))))))))))))).)))))))).........
*******************************************************************GGTAGTTCGACCGCGGAATTT********** CK-m0013-3p 20328
-------------------------GTTTAGATTTTTGGTTCGGAT---------------------------------------------------- t2216807 1
--------------------------TTTAGATTTTTGGTTCGGA----------------------------------------------------- t1414250 1
------------------------------------------------------------------TGGTAGTTCGACCGCGGAAT------------ t1292231 1
------------------------------------------------------------------TGGTAGTTCGACCGCGGAATT----------- t2849093 1
------------------------------------------------------------------TGGTAGTTCGACCGCGGAATTT---------- t0168102 3
------------------------------------------------------------------TGGTAGTTCGACCGCGGAATTTA--------- t0198130 3
------------------------------------------------------------------TGGTAGTTCGACCGCGGAATTTAT-------- t0870649 1
-------------------------------------------------------------------GGTAGTTCGACCGCGGAA------------- t0050355 11
-------------------------------------------------------------------GGTAGTTCGACCGCGGAAT------------ t0000285 1150
-------------------------------------------------------------------GGTAGTTCGACCGCGGAATT----------- t0000043 6122
-------------------------------------------------------------------GGTAGTTCGACCGCGGAATTT---------- t0000036 6918
-------------------------------------------------------------------GGTAGTTCGACCGCGGAATTTA--------- t0000058 4702
-------------------------------------------------------------------GGTAGTTCGACCGCGGAATTTAT-------- t0000299 1107
-------------------------------------------------------------------GGTAGTTCGACCGCGGAATTTATT------- t0002302 209
-------------------------------------------------------------------GGTAGTTCGACCGCGGAATTTATTT------ t0005440 95
--------------------------------------------------------------------GTAGTTCGACCGCGGAATTT---------- t0188472 3
--------------------------------------------------------------------GTAGTTCGACCGCGGAATTTA--------- t1772291 1
--------------------------------------------------------------------GTAGTTCGACCGCGGAATTTAT-------- t1103860 1
//
novel_mir_8
CK-m0014 CL3177.Contig13_All:3:127:- 125(nt) -39.76(kcal/mol)
ATTACAAATTCTTGACAGGATCGGTCACGGGCAGGTCAGAAGGCAACCGGCTCTTCATTCTGATCGAAGAGAAGCTCTTCCTTCGCGGCAGTGGCAGTGGCCAGGTCCTCTTTTGACATAACAAC CK-m0014 152
.........((..((.((((((((((((.(.((.(((.(((((.......((((((.........))))))........)))))..)))..)).).)))))).)))))).))..)).........
**********CTTGACAGGATCGGTCACGGG********************************************************************************************** CK-m0014-5p 150
----------CTTGACAGGATCGGTCACGGG---------------------------------------------------------------------------------------------- t0003407 147
----------CTTGACAGGATCGGTCACGGGC--------------------------------------------------------------------------------------------- t0288824 2
-----------TTGACAGGATCGGTCACGGGC--------------------------------------------------------------------------------------------- t2013740 1
-------------------------------CAGGTCAGAAGGCAACCGGCT------------------------------------------------------------------------- t0443022 2
//
novel_mir_8
CK-m0015 CL3177.Contig15_All:3:127:- 125(nt) -39.76(kcal/mol)
ATTACAAATTCTTGACAGGATCGGTCACGGGCAGGTCAGAAGGCAACCGGCTCTTCATTCTGATCGAAGAGAAGCTCTTCCTTCGCGGCAGTGGCAGTGGCCAGGTCCTCTTTTGACATAACAAC CK-m0015 152
.........((..((.((((((((((((.(.((.(((.(((((.......((((((.........))))))........)))))..)))..)).).)))))).)))))).))..)).........
**********CTTGACAGGATCGGTCACGGG********************************************************************************************** CK-m0015-5p 150
----------CTTGACAGGATCGGTCACGGG---------------------------------------------------------------------------------------------- t0003407 147
----------CTTGACAGGATCGGTCACGGGC--------------------------------------------------------------------------------------------- t0288824 2
-----------TTGACAGGATCGGTCACGGGC--------------------------------------------------------------------------------------------- t2013740 1
-------------------------------CAGGTCAGAAGGCAACCGGCT------------------------------------------------------------------------- t0443022 2
//
novel_mir_8
CK-m0016 CL3177.Contig7_All:1:121:- 121(nt) -39.76(kcal/mol)
ATTACAAATTCTTGACAGGATCGGTCACGGGCAGGTCAGAAGGCAACCGGCTCTTCATTCTGATCGAAGAGAAGCTCTTCCTTCGCGGCAGTGGCAGTGGCCAGGTCCTCTTTTGACATAA CK-m0016 152
.........((..((.((((((((((((.(.((.(((.(((((.......((((((.........))))))........)))))..)))..)).).)))))).)))))).))..)).....
**********CTTGACAGGATCGGTCACGGG****************************************************************************************** CK-m0016-5p 150
----------CTTGACAGGATCGGTCACGGG------------------------------------------------------------------------------------------ t0003407 147
----------CTTGACAGGATCGGTCACGGGC----------------------------------------------------------------------------------------- t0288824 2
-----------TTGACAGGATCGGTCACGGGC----------------------------------------------------------------------------------------- t2013740 1
-------------------------------CAGGTCAGAAGGCAACCGGCT--------------------------------------------------------------------- t0443022 2
//
novel_mir_9
CK-m0017 CL5907.Contig1_All:442:562:- 121(nt) -55.40(kcal/mol)
AATTTGGCGTTTAAAGATCATAAGCATGTTCTCCTCAGCCACATGGTACTTAGTTTAATTATCAAAGGCATAGATTTTGGTTGAGGAGAGCATGCTTATGATCTTAAAGACCCAAGAACCC CK-m0017 2340
..(((((.((((.((((((((((((((((((((((((((((...(((.((..((((.........))))..))))).))))))))))))))))))))))))))))..))))))))).....
********************TAAGCATGTTCTCCTCAGCCA******************************************************************************** CK-m0017-5p 1832
********************************************************************************TTGAGGAGAGCATGCTTATGA******************** CK-m0017-3p 493
----------------ATCATAAGCATGTTCTCCTCA------------------------------------------------------------------------------------ t0071657 7
-----------------TCATAAGCATGTTCTCCTCAG----------------------------------------------------------------------------------- t0142136 4
-------------------ATAAGCATGTTCTCCTCAGCC--------------------------------------------------------------------------------- t0017001 31
-------------------ATAAGCATGTTCTCCTCAGCCA-------------------------------------------------------------------------------- t0419408 2
--------------------TAAGCATGTTCTCCTCAGC---------------------------------------------------------------------------------- t2021501 1
--------------------TAAGCATGTTCTCCTCAGCC--------------------------------------------------------------------------------- t0159565 4
--------------------TAAGCATGTTCTCCTCAGCCA-------------------------------------------------------------------------------- t0000166 1760
---------------------AAGCATGTTCTCCTCAGCC--------------------------------------------------------------------------------- t0667666 1
---------------------AAGCATGTTCTCCTCAGCCA-------------------------------------------------------------------------------- t0021517 25
----------------------AGCATGTTCTCCTCAGCCACA------------------------------------------------------------------------------ t0150044 4
---------------------------------------------------------------------------TTTGGTTGAGGAGAGCATGCTTATG--------------------- t0139789 4
----------------------------------------------------------------------------TTGGTTGAGGAGAGCATGCTTATG--------------------- t2860241 1
-----------------------------------------------------------------------------TGGTTGAGGAGAGCATGCT------------------------- t0417545 2
-----------------------------------------------------------------------------TGGTTGAGGAGAGCATGCTTA----------------------- t0009368 57
-----------------------------------------------------------------------------TGGTTGAGGAGAGCATGCTTAT---------------------- t1061972 1
-------------------------------------------------------------------------------GTTGAGGAGAGCATGCTTATG--------------------- t0004219 120
--------------------------------------------------------------------------------TTGAGGAGAGCATGCTTATG--------------------- t0009054 59
--------------------------------------------------------------------------------TTGAGGAGAGCATGCTTATGA-------------------- t0001924 244
--------------------------------------------------------------------------------TTGAGGAGAGCATGCTTATGAT------------------- t1216218 1
---------------------------------------------------------------------------------TGAGGAGAGCATGCTTATG--------------------- t2648336 1
---------------------------------------------------------------------------------TGAGGAGAGCATGCTTATGAT------------------- t0111788 5
----------------------------------------------------------------------------------GAGGAGAGCATGCTTATGATC------------------ t1773744 1
-----------------------------------------------------------------------------------AGGAGAGCATGCTTATGATCT----------------- t0406007 2
-----------------------------------------------------------------------------------------------TTATGATCTTAAAGACCCAAG----- t0434476 2
----------------------------------------------------------------------------------------------------ATCTTAAAGACCCAAGAACCC t0781180 1
//
novel_mir_9
CK-m0018 CL5907.Contig2_All:618:738:- 121(nt) -55.40(kcal/mol)
AATTTGGCGTTTAAAGATCATAAGCATGTTCTCCTCAGCCACATGGTACTTAGTTTAATTATCAAAGGCATAGATTTTGGTTGAGGAGAGCATGCTTATGATCTTAAAGACCCAAGAACCC CK-m0018 2340
..(((((.((((.((((((((((((((((((((((((((((...(((.((..((((.........))))..))))).))))))))))))))))))))))))))))..))))))))).....
********************TAAGCATGTTCTCCTCAGCCA******************************************************************************** CK-m0018-5p 1832
********************************************************************************TTGAGGAGAGCATGCTTATGA******************** CK-m0018-3p 493
----------------ATCATAAGCATGTTCTCCTCA------------------------------------------------------------------------------------ t0071657 7
-----------------TCATAAGCATGTTCTCCTCAG----------------------------------------------------------------------------------- t0142136 4
-------------------ATAAGCATGTTCTCCTCAGCC--------------------------------------------------------------------------------- t0017001 31
-------------------ATAAGCATGTTCTCCTCAGCCA-------------------------------------------------------------------------------- t0419408 2
--------------------TAAGCATGTTCTCCTCAGC---------------------------------------------------------------------------------- t2021501 1
--------------------TAAGCATGTTCTCCTCAGCC--------------------------------------------------------------------------------- t0159565 4
--------------------TAAGCATGTTCTCCTCAGCCA-------------------------------------------------------------------------------- t0000166 1760
---------------------AAGCATGTTCTCCTCAGCC--------------------------------------------------------------------------------- t0667666 1
---------------------AAGCATGTTCTCCTCAGCCA-------------------------------------------------------------------------------- t0021517 25
----------------------AGCATGTTCTCCTCAGCCACA------------------------------------------------------------------------------ t0150044 4
---------------------------------------------------------------------------TTTGGTTGAGGAGAGCATGCTTATG--------------------- t0139789 4
----------------------------------------------------------------------------TTGGTTGAGGAGAGCATGCTTATG--------------------- t2860241 1
-----------------------------------------------------------------------------TGGTTGAGGAGAGCATGCT------------------------- t0417545 2
-----------------------------------------------------------------------------TGGTTGAGGAGAGCATGCTTA----------------------- t0009368 57
-----------------------------------------------------------------------------TGGTTGAGGAGAGCATGCTTAT---------------------- t1061972 1
-------------------------------------------------------------------------------GTTGAGGAGAGCATGCTTATG--------------------- t0004219 120
--------------------------------------------------------------------------------TTGAGGAGAGCATGCTTATG--------------------- t0009054 59
--------------------------------------------------------------------------------TTGAGGAGAGCATGCTTATGA-------------------- t0001924 244
--------------------------------------------------------------------------------TTGAGGAGAGCATGCTTATGAT------------------- t1216218 1
---------------------------------------------------------------------------------TGAGGAGAGCATGCTTATG--------------------- t2648336 1
---------------------------------------------------------------------------------TGAGGAGAGCATGCTTATGAT------------------- t0111788 5
----------------------------------------------------------------------------------GAGGAGAGCATGCTTATGATC------------------ t1773744 1
-----------------------------------------------------------------------------------AGGAGAGCATGCTTATGATCT----------------- t0406007 2
-----------------------------------------------------------------------------------------------TTATGATCTTAAAGACCCAAG----- t0434476 2
----------------------------------------------------------------------------------------------------ATCTTAAAGACCCAAGAACCC t0781180 1
//
novel_mir_10
CK-m0019 CL6752.Contig1_All:139:256:- 118(nt) -31.80(kcal/mol)
GTGTATTTGTTTAATCAATGATATCGGGGTATGGAGAAATTTTCTGCAGATCTTTCCTTGTGCCGCCCCTAGATTTTTTCTTGTGCCTCCCCTGTTTCTTTGATTAAACAGATTAACT CK-m0019 444
((..((((((((((((((.((((..(((((((((((((((((.(.(((.(........).))).).....))))))))))..))))).))..))))...))))))))))))))..)).
**********TTAATCAATGATATCGGGGTA*************************************************************************************** CK-m0019-5p 444
----------TTAATCAATGATATCGGGGTA--------------------------------------------------------------------------------------- t0000962 439
----------TTAATCAATGATATCGGGGTAT-------------------------------------------------------------------------------------- t0099613 5
//
novel_mir_10
CK-m0020 CL6752.Contig2_All:105:222:- 118(nt) -31.80(kcal/mol)
GTGTATTTGTTTAATCAATGATATCGGGGTATGGAGAAATTTTCTGCAGATCTTTCCTTGTGCCGCCCCTAGATTTTTTCTTGTGCCTCCCCTGTTTCTTTGATTAAACAGATTAACT CK-m0020 444
((..((((((((((((((.((((..(((((((((((((((((.(.(((.(........).))).).....))))))))))..))))).))..))))...))))))))))))))..)).
**********TTAATCAATGATATCGGGGTA*************************************************************************************** CK-m0020-5p 444
----------TTAATCAATGATATCGGGGTA--------------------------------------------------------------------------------------- t0000962 439
----------TTAATCAATGATATCGGGGTAT-------------------------------------------------------------------------------------- t0099613 5
//
novel_mir_11
CK-m0021 CL9872.Contig2_All:418:484:- 67(nt) -27.40(kcal/mol)
CTTATTCAGACTTCTGTGTTCAGACAGATTGGTCTGAATACACAAGTTTGATAAGAAATAAAGTGAG CK-m0021 10
(((((.(((((((.(((((((((((......))))))))))).))))))))))))............
************************************AATACACAAGTTTGATAAGAA********** CK-m0021-3p 9
--------------------------------TCTGAATACACAAGTTTGATA-------------- t1426738 1
------------------------------------AATACACAAGTTTGATAAGAA---------- t0058078 9
//
novel_mir_12
CK-m0022 Unigene10557_All:115:234:+ 120(nt) -52.20(kcal/mol)
TGCGGGAAAATGTGAAAAATTTATGCGTTGAATTACTGCTGTCTTTACGACTAAAGTATTCTTCTACTTCAGATGAAAGACTCGGTGATTCAATGCTTAAATTTTCCACATTTTCTCATT CK-m0022 9
...(((((((((((.((((((((.((((((((((((((..((((((.((.((.(((((......))))).)).)))))))).)))))))))))))).)))))))).)))))))))))...
************TGAAAAATTTATGCGTTGAATTA************************************************************************************* CK-m0022-5p 1
***************************************************************************************ATTCAATGCTTAAATTTTCCACA********** CK-m0022-3p 8
------------TGAAAAATTTATGCGTTGAAT--------------------------------------------------------------------------------------- t2330340 1
--------------------------------------------------------------------------------------GATTCAATGCTTAAATTTTCCACA---------- t0196912 3
---------------------------------------------------------------------------------------ATTCAATGCTTAAATTTTCCACA---------- t0106044 5
//
novel_mir_13
CK-m0023 Unigene11764_All:73:181:+ 109(nt) -52.90(kcal/mol)
GTGACGGAAGAGAGTGACAGAAGAGAGTGGGCACATTCGGGCAATTGTATAAGACGAGTATACCTTTGCAGGTGCGTGCCCACTTGTCTTTCTGTCACGCTTCCGGTTC CK-m0023 9
....((((((...((((((((((.((((((((((..((..((((..(((((.......)))))..)))).))...))))))))))...)))))))))).))))))....
*****************************************************************************GCCCACTTGTCTTTCTGTCACG********** CK-m0023-3p 9
-----------------------------------------------------------------------------GCCCACTTGTCTTTCTGTCACG---------- t0059275 9
//
novel_mir_14
CK-m0024 Unigene11849_All:161:265:+ 105(nt) -28.10(kcal/mol)
CGAGCGGTTAATGGGGACGGACTGTAAATTCGTTGGCAATATGTCTACGCTGGTTCAAATCCAGCTCGGCCCAAAAAAATTTGCAGACTCGCCATGAAATGATAT CK-m0024 12
....((....((((.((.(..(((((((((..((((......(((...(((((.......)))))..)))))))...))))))))).))).))))....))....
***************************************************************************AAAATTTGCAGACTCGCCAT********** CK-m0024-3p 12
--------------------------------------------------------------------------AAAAATTTGCAGACTCGCCAT---------- t2424212 1
--------------------------------------------------------------------------AAAAATTTGCAGACTCGCCATG--------- t2302407 1
--------------------------------------------------------------------------AAAAATTTGCAGACTCGCCATGA-------- t0299272 2
---------------------------------------------------------------------------AAAATTTGCAGACTCGCCA----------- t0328996 2
---------------------------------------------------------------------------AAAATTTGCAGACTCGCCAT---------- t0167887 3
---------------------------------------------------------------------------AAAATTTGCAGACTCGCCATG--------- t0896244 1
---------------------------------------------------------------------------AAAATTTGCAGACTCGCCATGAA------- t2388416 1
----------------------------------------------------------------------------AAATTTGCAGACTCGCCAT---------- t2086478 1
//
novel_mir_15
CK-m0025 Unigene14423_All:338:434:+ 97(nt) -50.90(kcal/mol)
TTTCAATGAGGTGCCCTTTTCCAAGTCTCATACGGCTCAGACTGTCACAAATGATGGAAATCACCGTATGAGACTTGGACGAGGCACCTCCTTGCAA CK-m0025 59655
...(((.((((((((.((.((((((((((((((((......((((((....))))))......)))))))))))))))).)))))))))).)))...
************GCCCTTTTCCAAGTCTCATACG*************************************************************** CK-m0025-5p 44
******************************************************************TATGAGACTTGGACGAGGCAC********** CK-m0025-3p 59594
---CAATGAGGTGCCCTTTTCCAAG------------------------------------------------------------------------ t0253145 2
-----------TGCCCTTTTCCAAGTCTCATAC---------------------------------------------------------------- t0388659 2
------------GCCCTTTTCCAAGTCTCATAC---------------------------------------------------------------- t0037337 14
------------GCCCTTTTCCAAGTCTCATACG--------------------------------------------------------------- t0996673 1
-------------CCCTTTTCCAAGTCTCATACGG-------------------------------------------------------------- t0045483 12
--------------CCTTTTCCAAGTCTCATACGG-------------------------------------------------------------- t0044674 12
--------------CCTTTTCCAAGTCTCATACGGC------------------------------------------------------------- t0224174 3
---------------------------------------------------------------CCGTATGAGACTTGGACGAGGCA----------- t1615894 1
---------------------------------------------------------------CCGTATGAGACTTGGACGAGGCAC---------- t0109162 5
----------------------------------------------------------------CGTATGAGACTTGGACGAGGC------------ t0010895 49
----------------------------------------------------------------CGTATGAGACTTGGACGAGGCA----------- t0070267 8
----------------------------------------------------------------CGTATGAGACTTGGACGAGGCAC---------- t0026584 20
----------------------------------------------------------------CGTATGAGACTTGGACGAGGCACC--------- t2052393 1
-----------------------------------------------------------------GTATGAGACTTGGACGAGGC------------ t1126283 1
-----------------------------------------------------------------GTATGAGACTTGGACGAGGCA----------- t0000939 447
-----------------------------------------------------------------GTATGAGACTTGGACGAGGCAC---------- t0041158 13
------------------------------------------------------------------TATGAGACTTGGACGAGGC------------ t0100278 5
------------------------------------------------------------------TATGAGACTTGGACGAGGCA----------- t0006221 84
------------------------------------------------------------------TATGAGACTTGGACGAGGCAC---------- t0000004 42561
------------------------------------------------------------------TATGAGACTTGGACGAGGCACC--------- t0131849 4
-------------------------------------------------------------------ATGAGACTTGGACGAGGC------------ t0921481 1
-------------------------------------------------------------------ATGAGACTTGGACGAGGCA----------- t0001809 259
-------------------------------------------------------------------ATGAGACTTGGACGAGGCAC---------- t0000014 15162
-------------------------------------------------------------------ATGAGACTTGGACGAGGCACC--------- t0000393 922
-------------------------------------------------------------------ATGAGACTTGGACGAGGCACCT-------- t0955148 1
--------------------------------------------------------------------TGAGACTTGGACGAGGCAC---------- t0053812 10
--------------------------------------------------------------------TGAGACTTGGACGAGGCACC--------- t0013833 38
---------------------------------------------------------------------GAGACTTGGACGAGGCAC---------- t1287340 1
---------------------------------------------------------------------GAGACTTGGACGAGGCACCTC------- t0563207 1
----------------------------------------------------------------------AGACTTGGACGAGGCACCTC------- t0291638 2
----------------------------------------------------------------------AGACTTGGACGAGGCACCTCC------ t0054337 10
-----------------------------------------------------------------------GACTTGGACGAGGCACCTCCT----- t2471787 1
------------------------------------------------------------------------ACTTGGACGAGGCACCTCCTTGCA- t2507671 1
---------------------------------------------------------------------------TGGACGAGGCACCTCCTTGCA- t0895805 1
//
novel_mir_16
CK-m0026 Unigene14721_All:554:719:+ 166(nt) -37.20(kcal/mol)
GGTGCGTGTATATTTTCAAAGATAGATTTTCGCAGTGGTTATCATCAGATTTGAATTCGTCTTGGTGAGGGTTTGTATGAACGGTTAGTCATGTCATTCGGGTTGTCTAATGCTCCGAGCACTTTTATGAGGTTTATGAATCAAGTCCTGAAGCCATTCATGAACA CK-m0026 13
..((((.((.(((((....))))).))...))))((((((.(((...(((((((.((((((((.((((((((.(((((((.(.....)))))).)).((((((........)).))))..)))))))).)))...)))))))))))).))))))))).........
**************************************************************************************************************************************TATGAATCAAGTCCTGAAGCCA********** CK-m0026-3p 12
------------------------------------------------------------------------------------------------------------------------------------TTTATGAATCAAGTCCTGAAGCCA---------- t2507090 1
-------------------------------------------------------------------------------------------------------------------------------------TTATGAATCAAGTCCTGAAGCC----------- t1815726 1
-------------------------------------------------------------------------------------------------------------------------------------TTATGAATCAAGTCCTGAAGCCAT--------- t1615371 1
--------------------------------------------------------------------------------------------------------------------------------------TATGAATCAAGTCCTGAAGCC----------- t0384934 2
--------------------------------------------------------------------------------------------------------------------------------------TATGAATCAAGTCCTGAAGCCA---------- t0218224 3
--------------------------------------------------------------------------------------------------------------------------------------TATGAATCAAGTCCTGAAGCCAT--------- t1672826 1
--------------------------------------------------------------------------------------------------------------------------------------TATGAATCAAGTCCTGAAGCCATT-------- t0277593 2
---------------------------------------------------------------------------------------------------------------------------------------ATGAATCAAGTCCTGAAGCCAT--------- t1438489 1
---------------------------------------------------------------------------------------------------------------------------------------------CAAGTCCTGAAGCCATTCATGA--- t2090719 1
//
novel_mir_17
CK-m0027 Unigene16293_All:53:170:+ 118(nt) -53.60(kcal/mol)
GAGCTCTTCTGGGCGTTATAGGTATGGATGGATTGGGGAGAAAAACTCTTTTCAAGTATGAGTATGAATGAATTTCTTCCCAAGGCCGCCCATACCGGTGATGTCCAGATGGTCCTCC CK-m0027 700
(((..((((((((((((((.(((((((.(((.(((((((((((.(.((..((((....))))...)).)...)))))))))))..))).))))))).)))))))))))).))..))).
********************GGTATGGATGGATTGGGGAGA***************************************************************************** CK-m0027-5p 364
****************************************************************************TTCCCAAGGCCGCCCATACCGG******************** CK-m0027-3p 324
-----CTTCTGGGCGTTATAGGTATG-------------------------------------------------------------------------------------------- t0142770 4
--------------------GGTATGGATGGATTGGGGAG------------------------------------------------------------------------------ t0084159 6
--------------------GGTATGGATGGATTGGGGAGA----------------------------------------------------------------------------- t0001325 335
--------------------GGTATGGATGGATTGGGGAGAA---------------------------------------------------------------------------- t0387058 2
--------------------GGTATGGATGGATTGGGGAGAAA--------------------------------------------------------------------------- t1196782 1
----------------------TATGGATGGATTGGGGAGA----------------------------------------------------------------------------- t0340919 2
----------------------TATGGATGGATTGGGGAGAAA--------------------------------------------------------------------------- t0029803 18
----------------------------------------------------------------------------TTCCCAAGGCCGCCCATACC---------------------- t2837376 1
----------------------------------------------------------------------------TTCCCAAGGCCGCCCATACCGG-------------------- t0001392 322
----------------------------------------------------------------------------TTCCCAAGGCCGCCCATACCGGT------------------- t1365479 1
-------------------------------------------------------------------------------------------ATACCGGTGATGTCCAGATGG------ t2014424 1
--------------------------------------------------------------------------------------------TACCGGTGATGTCCAGATGGT----- t0072638 7
//
novel_mir_18
CK-m0028 Unigene17397_All:521:658:+ 138(nt) -86.80(kcal/mol)
TTGGAGATGGAGGGAGCCTTCTTTGGGTTGCGACCTAGTTTGCCCCAGCAAATATCTGTCCAAACCATTTTTGCTTCGTGTGCACAGATATTTGCCCGTGCAAACTGGGTCGCAACCCAAAGAAGGCTCTCCCACCAC CK-m0028 17
.(((...(((.((((((((((((((((((((((((((((((((.(..((((((((((((.((.((.(........).)).)).))))))))))))..).)))))))))))))))))))))))))))))))))))))).
***********************************************************************************************************GGTCGCAACCCAAAGAAGGCT********** CK-m0028-3p 17
-----------------------------------------------------------------------------------------------------------GGTCGCAACCCAAAGAAGGC----------- t1441827 1
-----------------------------------------------------------------------------------------------------------GGTCGCAACCCAAAGAAGGCT---------- t0038522 14
-----------------------------------------------------------------------------------------------------------GGTCGCAACCCAAAGAAGGCTC--------- t0963619 1
-------------------------------------------------------------------------------------------------------------TCGCAACCCAAAGAAGGCTC--------- t2418765 1
//
novel_mir_19
CK-m0029 Unigene203_All:104:181:- 78(nt) -21.90(kcal/mol)
AATCGGTTTGTAGAAACTGGCAAACGAGGACAAGGATTCCAATTAGGTTTTTGTGGCCAGTAGCTTCGAAACATGGGA CK-m0029 127
..(((.((((.((..((((((..((((((((...(((....)))..)))))))).))))))..)).))))...)))..
**********TAGAAACTGGCAAACGAGGACA********************************************** CK-m0029-5p 123
--------TGTAGAAACTGGCAAACGAGGAC----------------------------------------------- t1286017 1
--------TGTAGAAACTGGCAAACGAGGACA---------------------------------------------- t1430739 1
---------GTAGAAACTGGCAAACGAGGA------------------------------------------------ t2290856 1
---------GTAGAAACTGGCAAACGAGGACA---------------------------------------------- t1882216 1
----------TAGAAACTGGCAAACGAGGAC----------------------------------------------- t0026797 20
----------TAGAAACTGGCAAACGAGGACA---------------------------------------------- t0005466 94
------------GAAACTGGCAAACGAGGACAA--------------------------------------------- t2463697 1
-------------AAACTGGCAAACGAGGACAAG-------------------------------------------- t2407688 1
-------------AAACTGGCAAACGAGGACAAGG------------------------------------------- t0402581 2
-------------AAACTGGCAAACGAGGACAAGGA------------------------------------------ t2625600 1
-----------------------------ACAAGGATTCCAATTAGGTTT---------------------------- t0131122 4
//
novel_mir_20
CK-m0030 Unigene25620_All:681:749:+ 69(nt) -37.50(kcal/mol)
GCAGTGATGATGACCATGCTCATGATCATCACCATGGTCATGGTCATGGTCATGGTCATGGTCATGGTC CK-m0030 6
.....(((.(((((((((..(((((((((.(((((....))))).)))))))))..))))))))).)))
**********TGACCATGCTCATGATCATCA************************************** CK-m0030-5p 6
----------TGACCATGCTCATGATCATCA-------------------------------------- t0094639 6
//
novel_mir_1
CK-m0031 Unigene29652_All:857:1041:- 185(nt) -69.90(kcal/mol)
AAAAGCCTAATAACCAGACACCCTTCCTTCTGCTAGAATGAAACCAGAACCAAATACCCAGATCCGACCCTAGATTCTAAATCCATACCACTGATGAAACATACAGATCATAATGAAATATCATATTTCTTGTTTCACAATTTTTGACAAGAGCAGAGGGAAGGGTGTCTGGTTATTAGGCAGAA CK-m0031 29
....((((((((((((((((((((((((((((((....((((((.((((..........(((..(.......)..)))............((((((...))).)))......((((....))))..)))).))))))((.....)).....))))))))))))))))))))))))))))))....
************ACCAGACACCCTTCCTTCTGC******************************************************************************************************************************************************** CK-m0031-5p 1
**********************************************************************************************************************************************************AGAGGGAAGGGTGTCTGGTTA********** CK-m0031-3p 27
------------ACCAGACACCCTTCCTTCTGC-------------------------------------------------------------------------------------------------------------------------------------------------------- t2208084 1
----------------------------------------------------------------------------------------------------------------------------------------------------------AGAGGGAAGGGTGTCTGGTTA---------- t0019724 27
----------------------------------------------------------------------------------------------------------------------------------------------------------------AAGGGTGTCTGGTTATTAGGC---- t1550650 1
//
novel_mir_1
CK-m0032 Unigene29653_All:531:715:- 185(nt) -69.90(kcal/mol)
AAAAGCCTAATAACCAGACACCCTTCCTTCTGCTAGAATGAAACCAGAACCAAATACCCAGATCCGACCCTAGATTCTAAATCCATACCACTGATGAAACATACAGATCATAATGAAATATCATATTTCTTGTTTCACAATTTTTGACAAGAGCAGAGGGAAGGGTGTCTGGTTATTAGGCAGAA CK-m0032 29
....((((((((((((((((((((((((((((((....((((((.((((..........(((..(.......)..)))............((((((...))).)))......((((....))))..)))).))))))((.....)).....))))))))))))))))))))))))))))))....
************ACCAGACACCCTTCCTTCTGC******************************************************************************************************************************************************** CK-m0032-5p 1
**********************************************************************************************************************************************************AGAGGGAAGGGTGTCTGGTTA********** CK-m0032-3p 27
------------ACCAGACACCCTTCCTTCTGC-------------------------------------------------------------------------------------------------------------------------------------------------------- t2208084 1
----------------------------------------------------------------------------------------------------------------------------------------------------------AGAGGGAAGGGTGTCTGGTTA---------- t0019724 27
----------------------------------------------------------------------------------------------------------------------------------------------------------------AAGGGTGTCTGGTTATTAGGC---- t1550650 1
//
novel_mir_8
CK-m0033 Unigene30240_All:3:127:- 125(nt) -39.76(kcal/mol)
ATTACAAATTCTTGACAGGATCGGTCACGGGCAGGTCAGAAGGCAACCGGCTCTTCATTCTGATCGAAGAGAAGCTCTTCCTTCGCGGCAGTGGCAGTGGCCAGGTCCTCTTTTGACATAACAAC CK-m0033 152
.........((..((.((((((((((((.(.((.(((.(((((.......((((((.........))))))........)))))..)))..)).).)))))).)))))).))..)).........
**********CTTGACAGGATCGGTCACGGG********************************************************************************************** CK-m0033-5p 150
----------CTTGACAGGATCGGTCACGGG---------------------------------------------------------------------------------------------- t0003407 147
----------CTTGACAGGATCGGTCACGGGC--------------------------------------------------------------------------------------------- t0288824 2
-----------TTGACAGGATCGGTCACGGGC--------------------------------------------------------------------------------------------- t2013740 1
-------------------------------CAGGTCAGAAGGCAACCGGCT------------------------------------------------------------------------- t0443022 2
//
novel_mir_8
CK-m0034 Unigene30241_All:3:127:- 125(nt) -39.76(kcal/mol)
ATTACAAATTCTTGACAGGATCGGTCACGGGCAGGTCAGAAGGCAACCGGCTCTTCATTCTGATCGAAGAGAAGCTCTTCCTTCGCGGCAGTGGCAGTGGCCAGGTCCTCTTTTGACATAACAAC CK-m0034 152
.........((..((.((((((((((((.(.((.(((.(((((.......((((((.........))))))........)))))..)))..)).).)))))).)))))).))..)).........
**********CTTGACAGGATCGGTCACGGG********************************************************************************************** CK-m0034-5p 150
----------CTTGACAGGATCGGTCACGGG---------------------------------------------------------------------------------------------- t0003407 147
----------CTTGACAGGATCGGTCACGGGC--------------------------------------------------------------------------------------------- t0288824 2
-----------TTGACAGGATCGGTCACGGGC--------------------------------------------------------------------------------------------- t2013740 1
-------------------------------CAGGTCAGAAGGCAACCGGCT------------------------------------------------------------------------- t0443022 2
//
novel_mir_21
CK-m0035 Unigene32489_All:122:215:- 94(nt) -38.00(kcal/mol)
CTCGAAATCTTTGGGCGTTAAAGGCTAGGAAAGACTAGTAGATCTGTTGTTGCAATTTTGTCTTTCCTATGCTTTTATGGCCTATTGTTTTCGA CK-m0035 35
.((((((.(..(((((..(((((((((((((((((....((((.(((....))))))).)))))))))).)))))))..)))))..).))))))
*************GGCGTTAAAGGCTAGGAAAGA************************************************************ CK-m0035-5p 2
**************************************************************TTTCCTATGCTTTTATGGCCTA********** CK-m0035-3p 33
-------------GGCGTTAAAGGCTAGGAAAGA------------------------------------------------------------ t0351516 2
------------------------------------------------------------TCTTTCCTATGCTTTTATGGCC------------ t0816768 1
--------------------------------------------------------------TTTCCTATGCTTTTATGGCC------------ t2257114 1
--------------------------------------------------------------TTTCCTATGCTTTTATGGCCT----------- t1952668 1
--------------------------------------------------------------TTTCCTATGCTTTTATGGCCTA---------- t0019027 28
--------------------------------------------------------------TTTCCTATGCTTTTATGGCCTAT--------- t0394866 2
//
novel_mir_1
CK-m0036 Unigene40671_All:1342:1526:- 185(nt) -69.90(kcal/mol)
AAAAGCCTAATAACCAGACACCCTTCCTTCTGCTAGAATGAAACCAGAACCAAATACCCAGATCCGACCCTAGATTCTAAATCCATACCACTGATGAAACATACAGATCATAATGAAATATCATATTTCTTGTTTCACAATTTTTGACAAGAGCAGAGGGAAGGGTGTCTGGTTATTAGGCAGAA CK-m0036 29
....((((((((((((((((((((((((((((((....((((((.((((..........(((..(.......)..)))............((((((...))).)))......((((....))))..)))).))))))((.....)).....))))))))))))))))))))))))))))))....
************ACCAGACACCCTTCCTTCTGC******************************************************************************************************************************************************** CK-m0036-5p 1
**********************************************************************************************************************************************************AGAGGGAAGGGTGTCTGGTTA********** CK-m0036-3p 27
------------ACCAGACACCCTTCCTTCTGC-------------------------------------------------------------------------------------------------------------------------------------------------------- t2208084 1
----------------------------------------------------------------------------------------------------------------------------------------------------------AGAGGGAAGGGTGTCTGGTTA---------- t0019724 27
----------------------------------------------------------------------------------------------------------------------------------------------------------------AAGGGTGTCTGGTTATTAGGC---- t1550650 1
//
novel_mir_8
CK-m0037 Unigene40730_All:1:121:- 121(nt) -39.76(kcal/mol)
ATTACAAATTCTTGACAGGATCGGTCACGGGCAGGTCAGAAGGCAACCGGCTCTTCATTCTGATCGAAGAGAAGCTCTTCCTTCGCGGCAGTGGCAGTGGCCAGGTCCTCTTTTGACATAA CK-m0037 152
.........((..((.((((((((((((.(.((.(((.(((((.......((((((.........))))))........)))))..)))..)).).)))))).)))))).))..)).....
**********CTTGACAGGATCGGTCACGGG****************************************************************************************** CK-m0037-5p 150
----------CTTGACAGGATCGGTCACGGG------------------------------------------------------------------------------------------ t0003407 147
----------CTTGACAGGATCGGTCACGGGC----------------------------------------------------------------------------------------- t0288824 2
-----------TTGACAGGATCGGTCACGGGC----------------------------------------------------------------------------------------- t2013740 1
-------------------------------CAGGTCAGAAGGCAACCGGCT--------------------------------------------------------------------- t0443022 2
//
novel_mir_8
CK-m0038 Unigene40733_All:1:121:- 121(nt) -39.76(kcal/mol)
ATTACAAATTCTTGACAGGATCGGTCACGGGCAGGTCAGAAGGCAACCGGCTCTTCATTCTGATCGAAGAGAAGCTCTTCCTTCGCGGCAGTGGCAGTGGCCAGGTCCTCTTTTGACATAA CK-m0038 152
.........((..((.((((((((((((.(.((.(((.(((((.......((((((.........))))))........)))))..)))..)).).)))))).)))))).))..)).....
**********CTTGACAGGATCGGTCACGGG****************************************************************************************** CK-m0038-5p 150
----------CTTGACAGGATCGGTCACGGG------------------------------------------------------------------------------------------ t0003407 147
----------CTTGACAGGATCGGTCACGGGC----------------------------------------------------------------------------------------- t0288824 2
-----------TTGACAGGATCGGTCACGGGC----------------------------------------------------------------------------------------- t2013740 1
-------------------------------CAGGTCAGAAGGCAACCGGCT--------------------------------------------------------------------- t0443022 2
//
novel_mir_1
CK-m0039 Unigene45219_All:418:602:- 185(nt) -69.90(kcal/mol)
AAAAGCCTAATAACCAGACACCCTTCCTTCTGCTAGAATGAAACCAGAACCAAATACCCAGATCCGACCCTAGATTCTAAATCCATACCACTGATGAAACATACAGATCATAATGAAATATCATATTTCTTGTTTCACAATTTTTGACAAGAGCAGAGGGAAGGGTGTCTGGTTATTAGGCAGAA CK-m0039 29
....((((((((((((((((((((((((((((((....((((((.((((..........(((..(.......)..)))............((((((...))).)))......((((....))))..)))).))))))((.....)).....))))))))))))))))))))))))))))))....
************ACCAGACACCCTTCCTTCTGC******************************************************************************************************************************************************** CK-m0039-5p 1
**********************************************************************************************************************************************************AGAGGGAAGGGTGTCTGGTTA********** CK-m0039-3p 27
------------ACCAGACACCCTTCCTTCTGC-------------------------------------------------------------------------------------------------------------------------------------------------------- t2208084 1
----------------------------------------------------------------------------------------------------------------------------------------------------------AGAGGGAAGGGTGTCTGGTTA---------- t0019724 27
----------------------------------------------------------------------------------------------------------------------------------------------------------------AAGGGTGTCTGGTTATTAGGC---- t1550650 1
//
novel_mir_22/novel_mir_27
CK-m0040 Unigene45237_All:1:295:- 295(nt) -88.13(kcal/mol)
GATGTTCATATTGAACACAGATGCTCTATCCATTATAATACTCCAGATGCTCCAAATGGTAGGTTGGAGCCATCTTTATTGCCCTTTTTCCTTGACTCAGCCAGGACAACAATAAAGATTCAGCCACACTCTCGGTCGAATTAAGTTTTTTCTGACCGTCAAATCTATAGGCATAGTTTTTTACGAATTCTCTGTCATTTTCCCTCAAAACCTTCGCTCAAAACCCACCCAACTGTGAAGTTAGCATGACCATCTGGAGTATCATAATGAGTATTATATTGGATTGATGCATCTG CK-m0040 31
..(((((.....)))))(((((((((.(((((.((((((((((..(((((((((.(((((.(((((((....(((((((((....((.((((.(......).)))).)))))))))))))))))).......((((((((.........))).)))))...........((((.((..(((...)))..)).))))...............((((((.................))))))........))))).))))))))).....)))))))))).))))).)).)))))))
********************ATGCTCTATCCATTATAATAC************************************************************************************************************************************************************************************************************************************************************** CK-m0040-5p 12
*********************************************************************************************************************************************************************************************************************************************************************************TTATATTGGATTGATGCATCTG CK-m0040-3p 19
--------------------ATGCTCTATCCATTATAATAC----------------------------------------------------------------------------------------------------------------------------------------------------------------------------------------------------------------------
---------------------------------------------------------------------------------------------------------------------------------------------------------------------------------------------------------------------------------------------------------------
---------------------------------------------------------------------------------------------------------------------------------------------------------------------------------------------------------------------------------------------------------------
---------------------------------------------------------------------------------------------------------------------------------------------------------------------------------------------------------------------------------------------------------------
---------------------------------------------------------------------------------------------------------------------------------------------------------------------------------------------------------------------------------------------------------------
---------------------------------------------------------------------------------------------------------------------------------------------------------------------------------------------------------------------------------------------------------------
//

## Sheet: TR
novel_mir_1
Copper-m0001 CL10589.Contig7_All:1016:1200:- 185(nt) -69.90(kcal/mol)
AAAAGCCTAATAACCAGACACCCTTCCTTCTGCTAGAATGAAACCAGAACCAAATACCCAGATCCGACCCTAGATTCTAAATCCATACCACTGATGAAACATACAGATCATAATGAAATATCATATTTCTTGTTTCACAATTTTTGACAAGAGCAGAGGGAAGGGTGTCTGGTTATTAGGCAGAA Copper-m0001 49
....((((((((((((((((((((((((((((((....((((((.((((..........(((..(.......)..)))............((((((...))).)))......((((....))))..)))).))))))((.....)).....))))))))))))))))))))))))))))))....
**********************************************************************************************************************************************************AGAGGGAAGGGTGTCTGGTTA********** Copper-m0001-3p 48
----------------------------------------------------------------------------------------------------------------------------------------------------------AGAGGGAAGGGTGTCTGGTTA---------- t0007988 47
----------------------------------------------------------------------------------------------------------------------------------------------------------AGAGGGAAGGGTGTCTGGTTAT--------- t0463134 1
----------------------------------------------------------------------------------------------------------------------------------------------------------------AAGGGTGTCTGGTTATTAGGC---- t1338890 1
//
novel_mir_2
Copper-m0002 CL1169.Contig2_All:775:926:- 152(nt) -73.70(kcal/mol)
ACGCCCTCGCCCTCAGCCTGTCCGATTGAGGCATTTCCGAAACTGAAGCCGTAACTCTAGAAGATTTCTTTTCTCCCTCGGGTTACGACTTCAATTTCAAACAAAATGACTCGGAAATGTTTCAATCGGACATGCTGACAGCGTTCGGCACC Copper-m0002 164
..(((..(((..(((((.((((((((((((((((((((((...(((((.((((((((.((.(((.......)))..)).)))))))).)))))...(((.......))).)))))))))))))))))))))).)))))..)))...)))...
********************TCCGATTGAGGCATTTCCGAA*************************************************************************************************************** Copper-m0002-5p 122
***************************************************************************************************************CGGAAATGTTTCAATCGGACA******************** Copper-m0002-3p 38
--------------AGCCTGTCCGATTGAGGCATT--------------------------------------------------------------------------------------------------------------------- t0125165 3
------------------TGTCCGATTGAGGCATTTCC------------------------------------------------------------------------------------------------------------------ t0594105 1
------------------TGTCCGATTGAGGCATTTCCG----------------------------------------------------------------------------------------------------------------- t0009122 42
--------------------TCCGATTGAGGCATTTCCGA---------------------------------------------------------------------------------------------------------------- t0088896 5
--------------------TCCGATTGAGGCATTTCCGAA--------------------------------------------------------------------------------------------------------------- t0004985 74
---------------------------------------------------------------------------------------------------------------CGGAAATGTTTCAATCGGACA-------------------- t0011579 33
-----------------------------------------------------------------------------------------------------------------GAAATGTTTCAATCGGACATG------------------ t0128551 3
------------------------------------------------------------------------------------------------------------------AAATGTTTCAATCGGACATGC----------------- t0860160 1
------------------------------------------------------------------------------------------------------------------AAATGTTTCAATCGGACATGCT---------------- t1300082 1
---------------------------------------------------------------------------------------------------------------------TGTTTCAATCGGACATGCTGA-------------- t2202093 1
//
novel_mir_4/novel_mir_23
Copper-m0003 CL1232.Contig1_All:251:328:+ 78(nt) -22.80(kcal/mol)
TCACCTCAGCTGGAACTTTACGGCACGGCTTAGTATTTTTATCGGTCCTTGCCAGGTGATATTTTAGCCTTGAGACTC Copper-m0003 25
....(((((((((((..((((((((.((.(..(((....)))..).)).))))..))))..)))))))..))))....
**********TGGAACTTTACGGCACGGCTT*********************************************** Copper-m0003-5p 25
----------TGGAACTTTACGGCACGGCT------------------------------------------------ t0512259 1
----------TGGAACTTTACGGCACGGCTT----------------------------------------------- t0054897 7
----------TGGAACTTTACGGCACGGCTTA---------------------------------------------- t0128930 3
----------TGGAACTTTACGGCACGGCTTAG--------------------------------------------- t0216761 2
----------TGGAACTTTACGGCACGGCTTAGT-------------------------------------------- t0081117 5
-----------GGAACTTTACGGCACGGCTTA---------------------------------------------- t1444469 1
-----------GGAACTTTACGGCACGGCTTAGTA------------------------------------------- t1530563 1
-------------AACTTTACGGCACGGCTTAGTATT----------------------------------------- t0087082 5
//
novel_mir_4
Copper-m0004 CL1436.Contig1_All:79:187:+ 109(nt) -42.70(kcal/mol)
GTGTATTTGTTTAATCATTAGAAACGTGGTGTCCGGTAGCAGATCGAAGAAATTTTAAGCTTTGGATTTTCTCCCCGGCTATCGCGTTTCTTTGATTAAACAGATAACT Copper-m0004 63
...((((((((((((((..((((((((((((.((((.((.(((((((((..........)))).))))).))..)))).)))))))))))).))))))))))))))...
**********TTAATCATTAGAAACGTGGTGT***************************************************************************** Copper-m0004-5p 62
********************************************************************************ATCGCGTTTCTTTGATTAAAC******** Copper-m0004-3p 1
---------TTTAATCATTAGAAACGTGGTG------------------------------------------------------------------------------ t0386681 1
----------TTAATCATTAGAAACGTGGT------------------------------------------------------------------------------- t1206745 1
----------TTAATCATTAGAAACGTGGTGT----------------------------------------------------------------------------- t0006283 59
----------TTAATCATTAGAAACGTGGTGTC---------------------------------------------------------------------------- t1623582 1
-------------------------------------------------------------------------------TATCGCGTTTCTTTGATTAAA--------- t0660954 1
//
novel_mir_24
Copper-m0005 CL1489.Contig1_All:913:985:- 73(nt) -29.10(kcal/mol)
ATTCCTTTTGGTCCTGTTACAAGAATCAGAGTGCTGTGTTGTACGATGATTTTGGAGCAGTTTCAGAGGGTGG Copper-m0005 8
...((((((((..(((((...(((((((..((((......))))..)))))))..)))))..))))))))...
*****************************************TACGATGATTTTGGAGCAGTTT********** Copper-m0005-3p 8
----------------------------------------GTACGATGATTTTGGAGCAGTTT---------- t1678324 1
-----------------------------------------TACGATGATTTTGGAGCAGTT----------- t1883410 1
-----------------------------------------TACGATGATTTTGGAGCAGTTT---------- t0069373 6
//
novel_mir_25
Copper-m0006 CL1747.Contig4_All:173:428:+ 256(nt) -65.40(kcal/mol)
TGGCTCACTCCCTCGTCCAAATTCTAAGCTCTAGCCTTAGTTTCCTATGCATTTATCGCCCAAAGTTGATAAACCAGCCGTTTGTCTCTTGGAGGAATGAATCTTTTATCATGAGCACTTGTAGGGTTGAACGACATATTTTAAAGAACCGATTCGACCGAAGTCTTACTCTTACACTCAGATCCGGAATCAATAGGAGAGTTTGCACTTTGCCGTCGGCTAGGTTCGGCTTTTGGGTCTTTGAGAGTTGGGACAG Copper-m0006 10
..............((((.((((((((((((.((((.........(((((.((((..((((.(((((((((((..(..(((((.((.....)).)))))..)..))))))).....))))...)))))))).).)))).......(((((...((((((((((((..((((((.......(((.....))).....))))))..).))))))..)))))...)))))))))...))).)))..)))))).))))..
**********CCTCGTCCAAATTCTAAGCTC********************************************************************************************************************************************************************************************************************************* Copper-m0006-5p 10
---------CCCTCGTCCAAATTCTAAGCT---------------------------------------------------------------------------------------------------------------------------------------------------------------------------------------------------------------------------------
----------CCTCGTCCAAATTCTAAGCTC--------------------------------------------------------------------------------------------------------------------------------------------------------------------------------------------------------------------------------
//
novel_mir_25
Copper-m0007 CL1747.Contig6_All:350:605:+ 256(nt) -65.40(kcal/mol)
TGGCTCACTCCCTCGTCCAAATTCTAAGCTCTAGCCTTAGTTTCCTATGCATTTATCGCCCAAAGTTGATAAACCAGCCGTTTGTCTCTTGGAGGAATGAATCTTTTATCATGAGCACTTGTAGGGTTGAACGACATATTTTAAAGAACCGATTCGACCGAAGTCTTACTCTTACACTCAGATCCGGAATCAATAGGAGAGTTTGCACTTTGCCGTCGGCTAGGTTCGGCTTTTGGGTCTTTGAGAGTTGGGACAG Copper-m0007 10
..............((((.((((((((((((.((((.........(((((.((((..((((.(((((((((((..(..(((((.((.....)).)))))..)..))))))).....))))...)))))))).).)))).......(((((...((((((((((((..((((((.......(((.....))).....))))))..).))))))..)))))...)))))))))...))).)))..)))))).))))..
**********CCTCGTCCAAATTCTAAGCTC********************************************************************************************************************************************************************************************************************************* Copper-m0007-5p 10
---------CCCTCGTCCAAATTCTAAGCT---------------------------------------------------------------------------------------------------------------------------------------------------------------------------------------------------------------------------------
----------CCTCGTCCAAATTCTAAGCTC--------------------------------------------------------------------------------------------------------------------------------------------------------------------------------------------------------------------------------
//
novel_mir_5
Copper-m0008 CL2152.Contig1_All:729:810:+ 82(nt) -23.30(kcal/mol)
CAGAAATGAGTTGGCCATCTGAGTGACATTACGTTGAACATTTGAGTCTGAGCCTAATCCTCAGATGACCAGATCATTGAAC Copper-m0008 545
....(((((.((((.((((((((.((..(((.(((.(((......)).).))).))))))))))))).)))).)))))....
**********TTGGCCATCTGAGTGACATTA*************************************************** Copper-m0008-5p 528
CAGAAATGAGTTGGCCATCTG------------------------------------------------------------- t0334901 2
-AGAAATGAGTTGGCCATCTGA------------------------------------------------------------ t2041701 1
----------TTGGCCATCTGAGTGACATT---------------------------------------------------- t0069672 6
----------TTGGCCATCTGAGTGACATTA--------------------------------------------------- t0000540 506
----------TTGGCCATCTGAGTGACATTAC-------------------------------------------------- t0031613 12
-----------TGGCCATCTGAGTGACATTAC-------------------------------------------------- t0099712 4
-----------------TCTGAGTGACATTACGTTGAA-------------------------------------------- t1133665 1
-----------------TCTGAGTGACATTACGTTGAAC------------------------------------------- t0954949 1
-----------------TCTGAGTGACATTACGTTGAACA------------------------------------------ t2372100 1
------------------CTGAGTGACATTACGTTGAACA------------------------------------------ t0484677 1
-------------------TGAGTGACATTACGTTGAACA------------------------------------------ t0293014 2
-----------------------TGACATTACGTTGAACATTTGA------------------------------------- t1323491 1
--------------------------CATTACGTTGAACATTTGAGT----------------------------------- t0443207 1
----------------------------TTACGTTGAACATTTGAGTCTG-------------------------------- t2481050 1
------------------------------ACGTTGAACATTTGAGTCTGA------------------------------- t0237218 2
---------------------------------TTGAACATTTGAGTCTGAGCC---------------------------- t0885091 1
-----------------------------------------TTGAGTCTGAGCCTAATCCTC-------------------- t0747549 1
----------------------------------------------------CCTAATCCTCAGATGACCAGA--------- t1763313 1
//
novel_mir_6
Copper-m0009 CL2152.Contig1_All:726:809:- 84(nt) -29.40(kcal/mol)
TTCAATGATCTGGTCATCTGAGGATTAGGCTCAGACTCAAATGTTCAACGTAATGTCACTCAGATGGCCAACTCATTTCTGAAG Copper-m0009 833
((((((((..(((((((((((((((...((...(((......)))....))...))).))))))))))))..))))...)))).
**********TGGTCATCTGAGGATTAGGCT***************************************************** Copper-m0009-5p 807
**************************************************TAATGTCACTCAGATGGCCAAC************ Copper-m0009-3p 13
--CAATGATCTGGTCATCTGAGGA------------------------------------------------------------ t0118726 4
---AATGATCTGGTCATCTGAGGATT---------------------------------------------------------- t2469536 1
----ATGATCTGGTCATCTGAGGAT----------------------------------------------------------- t1249521 1
--------TCTGGTCATCTGAGGATTAGG------------------------------------------------------- t1393146 1
--------TCTGGTCATCTGAGGATTAGGC------------------------------------------------------ t1456534 1
---------CTGGTCATCTGAGGATTAGGC------------------------------------------------------ t0025295 15
---------CTGGTCATCTGAGGATTAGGCT----------------------------------------------------- t0072837 6
----------TGGTCATCTGAGGATTAGG------------------------------------------------------- t0345559 2
----------TGGTCATCTGAGGATTAGGC------------------------------------------------------ t0054772 7
----------TGGTCATCTGAGGATTAGGCT----------------------------------------------------- t0000321 767
----------TGGTCATCTGAGGATTAGGCTC---------------------------------------------------- t0143588 3
-----------GGTCATCTGAGGATTAGGCT----------------------------------------------------- t0694646 1
-----------GGTCATCTGAGGATTAGGCTC---------------------------------------------------- t0148183 3
------------GTCATCTGAGGATTAGGCT----------------------------------------------------- t2017905 1
------------------TGAGGATTAGGCTCAGACTCAA-------------------------------------------- t1421710 1
------------------------------TCAGACTCAAATGTTCAACGT--------------------------------- t0957469 1
-----------------------------------------------------TGTCACTCAGATGGCCAAC------------ t1796077 1
-----------------------------------------------------TGTCACTCAGATGGCCAACTC---------- t0098402 4
-----------------------------------------------------TGTCACTCAGATGGCCAACTCA--------- t0051468 8
------------------------------------------------------GTCACTCAGATGGCCAACTCATT------- t0468797 1
-------------------------------------------------------TCACTCAGATGGCCAACTCAT-------- t1521869 1
----------------------------------------------------------CTCAGATGGCCAACTCATTTC----- t0495437 1
----------------------------------------------------------CTCAGATGGCCAACTCATTTCT---- t2034902 1
-----------------------------------------------------------TCAGATGGCCAACTCATTTCTG--- t2053175 1
//
novel_mir_5
Copper-m0010 CL2152.Contig2_All:340:421:+ 82(nt) -23.30(kcal/mol)
CAGAAATGAGTTGGCCATCTGAGTGACATTACGTTGAACATTTGAGTCTGAGCCTAATCCTCAGATGACCAGATCATTGAAC Copper-m0010 545
....(((((.((((.((((((((.((..(((.(((.(((......)).).))).))))))))))))).)))).)))))....
**********TTGGCCATCTGAGTGACATTA*************************************************** Copper-m0010-5p 528
CAGAAATGAGTTGGCCATCTG------------------------------------------------------------- t0334901 2
-AGAAATGAGTTGGCCATCTGA------------------------------------------------------------ t2041701 1
----------TTGGCCATCTGAGTGACATT---------------------------------------------------- t0069672 6
----------TTGGCCATCTGAGTGACATTA--------------------------------------------------- t0000540 506
----------TTGGCCATCTGAGTGACATTAC-------------------------------------------------- t0031613 12
-----------TGGCCATCTGAGTGACATTAC-------------------------------------------------- t0099712 4
-----------------TCTGAGTGACATTACGTTGAA-------------------------------------------- t1133665 1
-----------------TCTGAGTGACATTACGTTGAAC------------------------------------------- t0954949 1
-----------------TCTGAGTGACATTACGTTGAACA------------------------------------------ t2372100 1
------------------CTGAGTGACATTACGTTGAACA------------------------------------------ t0484677 1
-------------------TGAGTGACATTACGTTGAACA------------------------------------------ t0293014 2
-----------------------TGACATTACGTTGAACATTTGA------------------------------------- t1323491 1
--------------------------CATTACGTTGAACATTTGAGT----------------------------------- t0443207 1
----------------------------TTACGTTGAACATTTGAGTCTG-------------------------------- t2481050 1
------------------------------ACGTTGAACATTTGAGTCTGA------------------------------- t0237218 2
---------------------------------TTGAACATTTGAGTCTGAGCC---------------------------- t0885091 1
-----------------------------------------TTGAGTCTGAGCCTAATCCTC-------------------- t0747549 1
----------------------------------------------------CCTAATCCTCAGATGACCAGA--------- t1763313 1
//
novel_mir_6
Copper-m0011 CL2152.Contig2_All:337:420:- 84(nt) -29.40(kcal/mol)
TTCAATGATCTGGTCATCTGAGGATTAGGCTCAGACTCAAATGTTCAACGTAATGTCACTCAGATGGCCAACTCATTTCTGAAG Copper-m0011 833
((((((((..(((((((((((((((...((...(((......)))....))...))).))))))))))))..))))...)))).
**********TGGTCATCTGAGGATTAGGCT***************************************************** Copper-m0011-5p 807
**************************************************TAATGTCACTCAGATGGCCAAC************ Copper-m0011-3p 13
--CAATGATCTGGTCATCTGAGGA------------------------------------------------------------ t0118726 4
---AATGATCTGGTCATCTGAGGATT---------------------------------------------------------- t2469536 1
----ATGATCTGGTCATCTGAGGAT----------------------------------------------------------- t1249521 1
--------TCTGGTCATCTGAGGATTAGG------------------------------------------------------- t1393146 1
--------TCTGGTCATCTGAGGATTAGGC------------------------------------------------------ t1456534 1
---------CTGGTCATCTGAGGATTAGGC------------------------------------------------------ t0025295 15
---------CTGGTCATCTGAGGATTAGGCT----------------------------------------------------- t0072837 6
----------TGGTCATCTGAGGATTAGG------------------------------------------------------- t0345559 2
----------TGGTCATCTGAGGATTAGGC------------------------------------------------------ t0054772 7
----------TGGTCATCTGAGGATTAGGCT----------------------------------------------------- t0000321 767
----------TGGTCATCTGAGGATTAGGCTC---------------------------------------------------- t0143588 3
-----------GGTCATCTGAGGATTAGGCT----------------------------------------------------- t0694646 1
-----------GGTCATCTGAGGATTAGGCTC---------------------------------------------------- t0148183 3
------------GTCATCTGAGGATTAGGCT----------------------------------------------------- t2017905 1
------------------TGAGGATTAGGCTCAGACTCAA-------------------------------------------- t1421710 1
------------------------------TCAGACTCAAATGTTCAACGT--------------------------------- t0957469 1
-----------------------------------------------------TGTCACTCAGATGGCCAAC------------ t1796077 1
-----------------------------------------------------TGTCACTCAGATGGCCAACTC---------- t0098402 4
-----------------------------------------------------TGTCACTCAGATGGCCAACTCA--------- t0051468 8
------------------------------------------------------GTCACTCAGATGGCCAACTCATT------- t0468797 1
-------------------------------------------------------TCACTCAGATGGCCAACTCAT-------- t1521869 1
----------------------------------------------------------CTCAGATGGCCAACTCATTTC----- t0495437 1
----------------------------------------------------------CTCAGATGGCCAACTCATTTCT---- t2034902 1
-----------------------------------------------------------TCAGATGGCCAACTCATTTCTG--- t2053175 1
//
novel_mir_5
Copper-m0012 CL2152.Contig3_All:260:341:+ 82(nt) -23.30(kcal/mol)
CAGAAATGAGTTGGCCATCTGAGTGACATTACGTTGAACATTTGAGTCTGAGCCTAATCCTCAGATGACCAGATCATTGAAC Copper-m0012 545
....(((((.((((.((((((((.((..(((.(((.(((......)).).))).))))))))))))).)))).)))))....
**********TTGGCCATCTGAGTGACATTA*************************************************** Copper-m0012-5p 528
CAGAAATGAGTTGGCCATCTG------------------------------------------------------------- t0334901 2
-AGAAATGAGTTGGCCATCTGA------------------------------------------------------------ t2041701 1
----------TTGGCCATCTGAGTGACATT---------------------------------------------------- t0069672 6
----------TTGGCCATCTGAGTGACATTA--------------------------------------------------- t0000540 506
----------TTGGCCATCTGAGTGACATTAC-------------------------------------------------- t0031613 12
-----------TGGCCATCTGAGTGACATTAC-------------------------------------------------- t0099712 4
-----------------TCTGAGTGACATTACGTTGAA-------------------------------------------- t1133665 1
-----------------TCTGAGTGACATTACGTTGAAC------------------------------------------- t0954949 1
-----------------TCTGAGTGACATTACGTTGAACA------------------------------------------ t2372100 1
------------------CTGAGTGACATTACGTTGAACA------------------------------------------ t0484677 1
-------------------TGAGTGACATTACGTTGAACA------------------------------------------ t0293014 2
-----------------------TGACATTACGTTGAACATTTGA------------------------------------- t1323491 1
--------------------------CATTACGTTGAACATTTGAGT----------------------------------- t0443207 1
----------------------------TTACGTTGAACATTTGAGTCTG-------------------------------- t2481050 1
------------------------------ACGTTGAACATTTGAGTCTGA------------------------------- t0237218 2
---------------------------------TTGAACATTTGAGTCTGAGCC---------------------------- t0885091 1
-----------------------------------------TTGAGTCTGAGCCTAATCCTC-------------------- t0747549 1
----------------------------------------------------CCTAATCCTCAGATGACCAGA--------- t1763313 1
//
novel_mir_6
Copper-m0013 CL2152.Contig3_All:257:340:- 84(nt) -29.40(kcal/mol)
TTCAATGATCTGGTCATCTGAGGATTAGGCTCAGACTCAAATGTTCAACGTAATGTCACTCAGATGGCCAACTCATTTCTGAAG Copper-m0013 833
((((((((..(((((((((((((((...((...(((......)))....))...))).))))))))))))..))))...)))).
**********TGGTCATCTGAGGATTAGGCT***************************************************** Copper-m0013-5p 807
**************************************************TAATGTCACTCAGATGGCCAAC************ Copper-m0013-3p 13
--CAATGATCTGGTCATCTGAGGA------------------------------------------------------------ t0118726 4
---AATGATCTGGTCATCTGAGGATT---------------------------------------------------------- t2469536 1
----ATGATCTGGTCATCTGAGGAT----------------------------------------------------------- t1249521 1
--------TCTGGTCATCTGAGGATTAGG------------------------------------------------------- t1393146 1
--------TCTGGTCATCTGAGGATTAGGC------------------------------------------------------ t1456534 1
---------CTGGTCATCTGAGGATTAGGC------------------------------------------------------ t0025295 15
---------CTGGTCATCTGAGGATTAGGCT----------------------------------------------------- t0072837 6
----------TGGTCATCTGAGGATTAGG------------------------------------------------------- t0345559 2
----------TGGTCATCTGAGGATTAGGC------------------------------------------------------ t0054772 7
----------TGGTCATCTGAGGATTAGGCT----------------------------------------------------- t0000321 767
----------TGGTCATCTGAGGATTAGGCTC---------------------------------------------------- t0143588 3
-----------GGTCATCTGAGGATTAGGCT----------------------------------------------------- t0694646 1
-----------GGTCATCTGAGGATTAGGCTC---------------------------------------------------- t0148183 3
------------GTCATCTGAGGATTAGGCT----------------------------------------------------- t2017905 1
------------------TGAGGATTAGGCTCAGACTCAA-------------------------------------------- t1421710 1
------------------------------TCAGACTCAAATGTTCAACGT--------------------------------- t0957469 1
-----------------------------------------------------TGTCACTCAGATGGCCAAC------------ t1796077 1
-----------------------------------------------------TGTCACTCAGATGGCCAACTC---------- t0098402 4
-----------------------------------------------------TGTCACTCAGATGGCCAACTCA--------- t0051468 8
------------------------------------------------------GTCACTCAGATGGCCAACTCATT------- t0468797 1
-------------------------------------------------------TCACTCAGATGGCCAACTCAT-------- t1521869 1
----------------------------------------------------------CTCAGATGGCCAACTCATTTC----- t0495437 1
----------------------------------------------------------CTCAGATGGCCAACTCATTTCT---- t2034902 1
-----------------------------------------------------------TCAGATGGCCAACTCATTTCTG--- t2053175 1
//
novel_mir_7
Copper-m0014 CL2740.Contig7_All:48:145:+ 98(nt) -22.86(kcal/mol)
TAAAGCGAATTCTTTAGGGTTCGGTGTTTAGATTTTTGGTTCGGATTGCTGTCTTCATTCTATTTTTGGTAGTTCGACCGCGGAATTTATTTGTTTCT Copper-m0014 16834
.....(((((((....))))))).....((((((((((((.((((((((((...............)))))))))))))).)))))))).........
*******************************ATTTTTGGTTCGGATTGCTGT********************************************** Copper-m0014-5p 2
*******************************************************************GGTAGTTCGACCGCGGAATTT********** Copper-m0014-3p 16829
--------------TAGGGTTCGGTGTTTAGATT---------------------------------------------------------------- t0750596 1
--------------------------------TTTTTGGTTCGGATTGCT------------------------------------------------ t1250405 1
----------------------------------TTTGGTTCGGATTGCTGTC--------------------------------------------- t1963960 1
-----------------------------------TTGGTTCGGATTGCTGTCTTCATTC-------------------------------------- t2254837 1
-----------------------------------------------------------------TTGGTAGTTCGACCGCGGAATTTA--------- t1243838 1
------------------------------------------------------------------TGGTAGTTCGACCGCGGAAT------------ t1109466 1
------------------------------------------------------------------TGGTAGTTCGACCGCGGAATT----------- t0357104 2
------------------------------------------------------------------TGGTAGTTCGACCGCGGAATTT---------- t0076510 5
------------------------------------------------------------------TGGTAGTTCGACCGCGGAATTTA--------- t0154509 3
-------------------------------------------------------------------GGTAGTTCGACCGCGGAA------------- t0017903 22
-------------------------------------------------------------------GGTAGTTCGACCGCGGAAT------------ t0000196 1128
-------------------------------------------------------------------GGTAGTTCGACCGCGGAATT----------- t0000039 5377
-------------------------------------------------------------------GGTAGTTCGACCGCGGAATTT---------- t0000037 5529
-------------------------------------------------------------------GGTAGTTCGACCGCGGAATTTA--------- t0000057 3617
-------------------------------------------------------------------GGTAGTTCGACCGCGGAATTTAT-------- t0000280 869
-------------------------------------------------------------------GGTAGTTCGACCGCGGAATTTATT------- t0001937 175
-------------------------------------------------------------------GGTAGTTCGACCGCGGAATTTATTT------ t0003846 93
--------------------------------------------------------------------GTAGTTCGACCGCGGAAT------------ t0826073 1
--------------------------------------------------------------------GTAGTTCGACCGCGGAATT----------- t1332763 1
--------------------------------------------------------------------GTAGTTCGACCGCGGAATTT---------- t0146596 3
--------------------------------------------------------------------GTAGTTCGACCGCGGAATTTA--------- t1535131 1
----------------------------------------------------------------------AGTTCGACCGCGGAATTT---------- t0724551 1
------------------------------------------------------------------------TTCGACCGCGGAATTTATTTGT---- t1724614 1
//
novel_mir_7
Copper-m0015 CL2740.Contig8_All:48:145:+ 98(nt) -22.86(kcal/mol)
TAAAGCGAATTCTTTAGGGTTCGGTGTTTAGATTTTTGGTTCGGATTGCTGTCTTCATTCTATTTTTGGTAGTTCGACCGCGGAATTTATTTGTTTCT Copper-m0015 16834
.....(((((((....))))))).....((((((((((((.((((((((((...............)))))))))))))).)))))))).........
*******************************ATTTTTGGTTCGGATTGCTGT********************************************** Copper-m0015-5p 2
*******************************************************************GGTAGTTCGACCGCGGAATTT********** Copper-m0015-3p 16829
--------------TAGGGTTCGGTGTTTAGATT---------------------------------------------------------------- t0750596 1
--------------------------------TTTTTGGTTCGGATTGCT------------------------------------------------ t1250405 1
----------------------------------TTTGGTTCGGATTGCTGTC--------------------------------------------- t1963960 1
-----------------------------------TTGGTTCGGATTGCTGTCTTCATTC-------------------------------------- t2254837 1
-----------------------------------------------------------------TTGGTAGTTCGACCGCGGAATTTA--------- t1243838 1
------------------------------------------------------------------TGGTAGTTCGACCGCGGAAT------------ t1109466 1
------------------------------------------------------------------TGGTAGTTCGACCGCGGAATT----------- t0357104 2
------------------------------------------------------------------TGGTAGTTCGACCGCGGAATTT---------- t0076510 5
------------------------------------------------------------------TGGTAGTTCGACCGCGGAATTTA--------- t0154509 3
-------------------------------------------------------------------GGTAGTTCGACCGCGGAA------------- t0017903 22
-------------------------------------------------------------------GGTAGTTCGACCGCGGAAT------------ t0000196 1128
-------------------------------------------------------------------GGTAGTTCGACCGCGGAATT----------- t0000039 5377
-------------------------------------------------------------------GGTAGTTCGACCGCGGAATTT---------- t0000037 5529
-------------------------------------------------------------------GGTAGTTCGACCGCGGAATTTA--------- t0000057 3617
-------------------------------------------------------------------GGTAGTTCGACCGCGGAATTTAT-------- t0000280 869
-------------------------------------------------------------------GGTAGTTCGACCGCGGAATTTATT------- t0001937 175
-------------------------------------------------------------------GGTAGTTCGACCGCGGAATTTATTT------ t0003846 93
--------------------------------------------------------------------GTAGTTCGACCGCGGAAT------------ t0826073 1
--------------------------------------------------------------------GTAGTTCGACCGCGGAATT----------- t1332763 1
--------------------------------------------------------------------GTAGTTCGACCGCGGAATTT---------- t0146596 3
--------------------------------------------------------------------GTAGTTCGACCGCGGAATTTA--------- t1535131 1
----------------------------------------------------------------------AGTTCGACCGCGGAATTT---------- t0724551 1
------------------------------------------------------------------------TTCGACCGCGGAATTTATTTGT---- t1724614 1
//
novel_mir_26
Copper-m0016 CL2785.Contig1_All:248:386:+ 139(nt) -46.60(kcal/mol)
GGGCAAATTGCGGGCTTGGATTGTTGGGAAGTGATCATTTAGCTTTGGGGAGAGGCATGCTTGTATTGCTTCTCCTGTTGATGGAACAGCAAGGTCAGACCGGTACAACCCTGCATCTTCGAGCCAACGTAATACAGGA Copper-m0016 8
......((((((((((((((.(((.(((..(((....(((..(((((.(((((((((.........))))))))).(((.....)))..)))))..)))....)))..))).)))..))))))))..))))))......
**********CGGGCTTGGATTGTTGGGAAG************************************************************************************************************ Copper-m0016-5p 6
***********************************************************************************************************ACCCTGCATCTTCGAGCCAACGTA******** Copper-m0016-3p 1
---------GCGGGCTTGGATTGTTGGGAA------------------------------------------------------------------------------------------------------------- t0981867 1
----------CGGGCTTGGATTGTTGGGAAG------------------------------------------------------------------------------------------------------------ t0079734 5
---------------------------------------------------------------------------------TGGAACAGCAAGGTCAGACCGG------------------------------------ t2137923 1
----------------------------------------------------------------------------------------------------------AACCCTGCATCTTCGAGCCAA------------ t2414817 1
//
novel_mir_26
Copper-m0017 CL2785.Contig2_All:248:362:+ 115(nt) -39.70(kcal/mol)
GGGCAAATTGCGGGCTTGGATTGTTGGGAAGTGATCATTTAGCTTTGGGGAGAGGCATGCTTGTATTGCTTCTCCTGTTTACAACCCTGCATCTTCGAGCCAACGTAATACAGGA Copper-m0017 7
......((((((((((((((.(((.(((..((((.((........)).(((((((((.........)))))))))...))))..))).)))..))))))))..))))))......
**********CGGGCTTGGATTGTTGGGAAG************************************************************************************ Copper-m0017-5p 6
***********************************************************************************ACCCTGCATCTTCGAGCCAACGTA******** Copper-m0017-3p 1
---------GCGGGCTTGGATTGTTGGGAA------------------------------------------------------------------------------------- t0981867 1
----------CGGGCTTGGATTGTTGGGAAG------------------------------------------------------------------------------------ t0079734 5
----------------------------------------------------------------------------------AACCCTGCATCTTCGAGCCAA------------ t2414817 1
//
novel_mir_26
Copper-m0018 CL2785.Contig4_All:313:451:+ 139(nt) -46.60(kcal/mol)
GGGCAAATTGCGGGCTTGGATTGTTGGGAAGTGATCATTTAGCTTTGGGGAGAGGCATGCTTGTATTGCTTCTCCTGTTGATGGAACAGCAAGGTCAGACCGGTACAACCCTGCATCTTCGAGCCAACGTAATACAGGA Copper-m0018 8
......((((((((((((((.(((.(((..(((....(((..(((((.(((((((((.........))))))))).(((.....)))..)))))..)))....)))..))).)))..))))))))..))))))......
**********CGGGCTTGGATTGTTGGGAAG************************************************************************************************************ Copper-m0018-5p 6
***********************************************************************************************************ACCCTGCATCTTCGAGCCAACGTA******** Copper-m0018-3p 1
---------GCGGGCTTGGATTGTTGGGAA------------------------------------------------------------------------------------------------------------- t0981867 1
----------CGGGCTTGGATTGTTGGGAAG------------------------------------------------------------------------------------------------------------ t0079734 5
---------------------------------------------------------------------------------TGGAACAGCAAGGTCAGACCGG------------------------------------ t2137923 1
----------------------------------------------------------------------------------------------------------AACCCTGCATCTTCGAGCCAA------------ t2414817 1
//
novel_mir_26
Copper-m0019 CL2785.Contig6_All:313:451:+ 139(nt) -46.60(kcal/mol)
GGGCAAATTGCGGGCTTGGATTGTTGGGAAGTGATCATTTAGCTTTGGGGAGAGGCATGCTTGTATTGCTTCTCCTGTTGATGGAACAGCAAGGTCAGACCGGTACAACCCTGCATCTTCGAGCCAACGTAATACAGGA Copper-m0019 8
......((((((((((((((.(((.(((..(((....(((..(((((.(((((((((.........))))))))).(((.....)))..)))))..)))....)))..))).)))..))))))))..))))))......
**********CGGGCTTGGATTGTTGGGAAG************************************************************************************************************ Copper-m0019-5p 6
***********************************************************************************************************ACCCTGCATCTTCGAGCCAACGTA******** Copper-m0019-3p 1
---------GCGGGCTTGGATTGTTGGGAA------------------------------------------------------------------------------------------------------------- t0981867 1
----------CGGGCTTGGATTGTTGGGAAG------------------------------------------------------------------------------------------------------------ t0079734 5
---------------------------------------------------------------------------------TGGAACAGCAAGGTCAGACCGG------------------------------------ t2137923 1
----------------------------------------------------------------------------------------------------------AACCCTGCATCTTCGAGCCAA------------ t2414817 1
//
novel_mir_26
Copper-m0020 CL2785.Contig7_All:313:427:+ 115(nt) -39.70(kcal/mol)
GGGCAAATTGCGGGCTTGGATTGTTGGGAAGTGATCATTTAGCTTTGGGGAGAGGCATGCTTGTATTGCTTCTCCTGTTTACAACCCTGCATCTTCGAGCCAACGTAATACAGGA Copper-m0020 7
......((((((((((((((.(((.(((..((((.((........)).(((((((((.........)))))))))...))))..))).)))..))))))))..))))))......
**********CGGGCTTGGATTGTTGGGAAG************************************************************************************ Copper-m0020-5p 6
***********************************************************************************ACCCTGCATCTTCGAGCCAACGTA******** Copper-m0020-3p 1
---------GCGGGCTTGGATTGTTGGGAA------------------------------------------------------------------------------------- t0981867 1
----------CGGGCTTGGATTGTTGGGAAG------------------------------------------------------------------------------------ t0079734 5
----------------------------------------------------------------------------------AACCCTGCATCTTCGAGCCAA------------ t2414817 1
//
novel_mir_8
Copper-m0021 CL3177.Contig13_All:3:127:- 125(nt) -39.76(kcal/mol)
ATTACAAATTCTTGACAGGATCGGTCACGGGCAGGTCAGAAGGCAACCGGCTCTTCATTCTGATCGAAGAGAAGCTCTTCCTTCGCGGCAGTGGCAGTGGCCAGGTCCTCTTTTGACATAACAAC Copper-m0021 119
.........((..((.((((((((((((.(.((.(((.(((((.......((((((.........))))))........)))))..)))..)).).)))))).)))))).))..)).........
**********CTTGACAGGATCGGTCACGGG********************************************************************************************** Copper-m0021-5p 116
----------CTTGACAGGATCGGTCACGGG---------------------------------------------------------------------------------------------- t0003115 113
----------CTTGACAGGATCGGTCACGGGCA-------------------------------------------------------------------------------------------- t2201811 1
-----------TTGACAGGATCGGTCACGGGCA-------------------------------------------------------------------------------------------- t1126866 1
-------------GACAGGATCGGTCACGGGCAG------------------------------------------------------------------------------------------- t1012454 1
-------------------------------CAGGTCAGAAGGCAACCGGCT------------------------------------------------------------------------- t0358427 2
---------------------------------------------------------------------------TCTTCCTTCGCGGCAGTGGCA----------------------------- t0562775 1
//
novel_mir_8
Copper-m0022 CL3177.Contig15_All:3:127:- 125(nt) -39.76(kcal/mol)
ATTACAAATTCTTGACAGGATCGGTCACGGGCAGGTCAGAAGGCAACCGGCTCTTCATTCTGATCGAAGAGAAGCTCTTCCTTCGCGGCAGTGGCAGTGGCCAGGTCCTCTTTTGACATAACAAC Copper-m0022 119
.........((..((.((((((((((((.(.((.(((.(((((.......((((((.........))))))........)))))..)))..)).).)))))).)))))).))..)).........
**********CTTGACAGGATCGGTCACGGG********************************************************************************************** Copper-m0022-5p 116
----------CTTGACAGGATCGGTCACGGG---------------------------------------------------------------------------------------------- t0003115 113
----------CTTGACAGGATCGGTCACGGGCA-------------------------------------------------------------------------------------------- t2201811 1
-----------TTGACAGGATCGGTCACGGGCA-------------------------------------------------------------------------------------------- t1126866 1
-------------GACAGGATCGGTCACGGGCAG------------------------------------------------------------------------------------------- t1012454 1
-------------------------------CAGGTCAGAAGGCAACCGGCT------------------------------------------------------------------------- t0358427 2
---------------------------------------------------------------------------TCTTCCTTCGCGGCAGTGGCA----------------------------- t0562775 1
//
novel_mir_8
Copper-m0023 CL3177.Contig7_All:1:121:- 121(nt) -39.76(kcal/mol)
ATTACAAATTCTTGACAGGATCGGTCACGGGCAGGTCAGAAGGCAACCGGCTCTTCATTCTGATCGAAGAGAAGCTCTTCCTTCGCGGCAGTGGCAGTGGCCAGGTCCTCTTTTGACATAA Copper-m0023 119
.........((..((.((((((((((((.(.((.(((.(((((.......((((((.........))))))........)))))..)))..)).).)))))).)))))).))..)).....
**********CTTGACAGGATCGGTCACGGG****************************************************************************************** Copper-m0023-5p 116
----------CTTGACAGGATCGGTCACGGG------------------------------------------------------------------------------------------ t0003115 113
----------CTTGACAGGATCGGTCACGGGCA---------------------------------------------------------------------------------------- t2201811 1
-----------TTGACAGGATCGGTCACGGGCA---------------------------------------------------------------------------------------- t1126866 1
-------------GACAGGATCGGTCACGGGCAG--------------------------------------------------------------------------------------- t1012454 1
-------------------------------CAGGTCAGAAGGCAACCGGCT--------------------------------------------------------------------- t0358427 2
---------------------------------------------------------------------------TCTTCCTTCGCGGCAGTGGCA------------------------- t0562775 1
//
novel_mir_27
Copper-m0024 CL4800.Contig2_All:691:816:- 126(nt) -25.29(kcal/mol)
TCATAATGAGTATTATATTGGATTGATGCATCTGTGTTCATGAGAGCATAATGAACCCATCAACCCCGTAATTGGTTCACAACAGATTGAACTCTAGCAAAATAATCAGATATAGATTCAGAGTTA Copper-m0024 17
......(((((.(((((((.(((((.(((...(((((((....))))))).((((((................)))))).................)))...))))).))))))))))))......
**********TATTATATTGGATTGATGCATC********************************************************************************************** Copper-m0024-5p 17
----------TATTATATTGGATTGATGCAT----------------------------------------------------------------------------------------------- t0573062 1
----------TATTATATTGGATTGATGCATC---------------------------------------------------------------------------------------------- t0052675 8
-----------ATTATATTGGATTGATGCATC---------------------------------------------------------------------------------------------- t1255722 1
-----------ATTATATTGGATTGATGCATCT--------------------------------------------------------------------------------------------- t0166380 3
------------TTATATTGGATTGATGCATCT--------------------------------------------------------------------------------------------- t0246995 2
------------TTATATTGGATTGATGCATCTG-------------------------------------------------------------------------------------------- t0290683 2
//
novel_mir_9
Copper-m0025 CL5907.Contig1_All:442:562:- 121(nt) -55.40(kcal/mol)
AATTTGGCGTTTAAAGATCATAAGCATGTTCTCCTCAGCCACATGGTACTTAGTTTAATTATCAAAGGCATAGATTTTGGTTGAGGAGAGCATGCTTATGATCTTAAAGACCCAAGAACCC Copper-m0025 1967
..(((((.((((.((((((((((((((((((((((((((((...(((.((..((((.........))))..))))).))))))))))))))))))))))))))))..))))))))).....
********************TAAGCATGTTCTCCTCAGCCA******************************************************************************** Copper-m0025-5p 1548
********************************************************************************TTGAGGAGAGCATGCTTATGA******************** Copper-m0025-3p 412
----------------ATCATAAGCATGTTCTCCTCA------------------------------------------------------------------------------------ t0074784 5
-----------------TCATAAGCATGTTCTCCTCAG----------------------------------------------------------------------------------- t0109150 4
-------------------ATAAGCATGTTCTCCTCAGCC--------------------------------------------------------------------------------- t0023714 16
-------------------ATAAGCATGTTCTCCTCAGCCA-------------------------------------------------------------------------------- t0072904 6
--------------------TAAGCATGTTCTCCTCAGC---------------------------------------------------------------------------------- t0161517 3
--------------------TAAGCATGTTCTCCTCAGCC--------------------------------------------------------------------------------- t0122982 4
--------------------TAAGCATGTTCTCCTCAGCCA-------------------------------------------------------------------------------- t0000149 1486
---------------------AAGCATGTTCTCCTCAGCCA-------------------------------------------------------------------------------- t0016834 23
----------------------AGCATGTTCTCCTCAGCCACA------------------------------------------------------------------------------ t0071404 6
---------------------------------------------------------------------------TTTGGTTGAGGAGAGCATGCTTATG--------------------- t1405901 1
----------------------------------------------------------------------------TTGGTTGAGGAGAGCATGCTTATG--------------------- t2497170 1
-----------------------------------------------------------------------------TGGTTGAGGAGAGCATGCTTA----------------------- t0008441 45
-------------------------------------------------------------------------------GTTGAGGAGAGCATGCTTAT---------------------- t0345529 2
-------------------------------------------------------------------------------GTTGAGGAGAGCATGCTTATG--------------------- t0003877 92
--------------------------------------------------------------------------------TTGAGGAGAGCATGCTTA----------------------- t1733466 1
--------------------------------------------------------------------------------TTGAGGAGAGCATGCTTAT---------------------- t1244223 1
--------------------------------------------------------------------------------TTGAGGAGAGCATGCTTATG--------------------- t0006440 58
--------------------------------------------------------------------------------TTGAGGAGAGCATGCTTATGA-------------------- t0001586 209
--------------------------------------------------------------------------------TTGAGGAGAGCATGCTTATGAT------------------- t1042168 1
---------------------------------------------------------------------------------TGAGGAGAGCATGCTTATG--------------------- t2309811 1
---------------------------------------------------------------------------------TGAGGAGAGCATGCTTATGAT------------------- t0285594 2
//
novel_mir_9
Copper-m0026 CL5907.Contig2_All:618:738:- 121(nt) -55.40(kcal/mol)
AATTTGGCGTTTAAAGATCATAAGCATGTTCTCCTCAGCCACATGGTACTTAGTTTAATTATCAAAGGCATAGATTTTGGTTGAGGAGAGCATGCTTATGATCTTAAAGACCCAAGAACCC Copper-m0026 1967
..(((((.((((.((((((((((((((((((((((((((((...(((.((..((((.........))))..))))).))))))))))))))))))))))))))))..))))))))).....
********************TAAGCATGTTCTCCTCAGCCA******************************************************************************** Copper-m0026-5p 1548
********************************************************************************TTGAGGAGAGCATGCTTATGA******************** Copper-m0026-3p 412
----------------ATCATAAGCATGTTCTCCTCA------------------------------------------------------------------------------------ t0074784 5
-----------------TCATAAGCATGTTCTCCTCAG----------------------------------------------------------------------------------- t0109150 4
-------------------ATAAGCATGTTCTCCTCAGCC--------------------------------------------------------------------------------- t0023714 16
-------------------ATAAGCATGTTCTCCTCAGCCA-------------------------------------------------------------------------------- t0072904 6
--------------------TAAGCATGTTCTCCTCAGC---------------------------------------------------------------------------------- t0161517 3
--------------------TAAGCATGTTCTCCTCAGCC--------------------------------------------------------------------------------- t0122982 4
--------------------TAAGCATGTTCTCCTCAGCCA-------------------------------------------------------------------------------- t0000149 1486
---------------------AAGCATGTTCTCCTCAGCCA-------------------------------------------------------------------------------- t0016834 23
----------------------AGCATGTTCTCCTCAGCCACA------------------------------------------------------------------------------ t0071404 6
---------------------------------------------------------------------------TTTGGTTGAGGAGAGCATGCTTATG--------------------- t1405901 1
----------------------------------------------------------------------------TTGGTTGAGGAGAGCATGCTTATG--------------------- t2497170 1
-----------------------------------------------------------------------------TGGTTGAGGAGAGCATGCTTA----------------------- t0008441 45
-------------------------------------------------------------------------------GTTGAGGAGAGCATGCTTAT---------------------- t0345529 2
-------------------------------------------------------------------------------GTTGAGGAGAGCATGCTTATG--------------------- t0003877 92
--------------------------------------------------------------------------------TTGAGGAGAGCATGCTTA----------------------- t1733466 1
--------------------------------------------------------------------------------TTGAGGAGAGCATGCTTAT---------------------- t1244223 1
--------------------------------------------------------------------------------TTGAGGAGAGCATGCTTATG--------------------- t0006440 58
--------------------------------------------------------------------------------TTGAGGAGAGCATGCTTATGA-------------------- t0001586 209
--------------------------------------------------------------------------------TTGAGGAGAGCATGCTTATGAT------------------- t1042168 1
---------------------------------------------------------------------------------TGAGGAGAGCATGCTTATG--------------------- t2309811 1
---------------------------------------------------------------------------------TGAGGAGAGCATGCTTATGAT------------------- t0285594 2
//
novel_mir_10
Copper-m0027 CL6752.Contig1_All:139:256:- 118(nt) -31.80(kcal/mol)
GTGTATTTGTTTAATCAATGATATCGGGGTATGGAGAAATTTTCTGCAGATCTTTCCTTGTGCCGCCCCTAGATTTTTTCTTGTGCCTCCCCTGTTTCTTTGATTAAACAGATTAACT Copper-m0027 312
((..((((((((((((((.((((..(((((((((((((((((.(.(((.(........).))).).....))))))))))..))))).))..))))...))))))))))))))..)).
**********TTAATCAATGATATCGGGGTA*************************************************************************************** Copper-m0027-5p 312
----------TTAATCAATGATATCGGGGT---------------------------------------------------------------------------------------- t1382100 1
----------TTAATCAATGATATCGGGGTA--------------------------------------------------------------------------------------- t0000994 308
----------TTAATCAATGATATCGGGGTAT-------------------------------------------------------------------------------------- t0125812 3
//
novel_mir_10
Copper-m0028 CL6752.Contig2_All:105:222:- 118(nt) -31.80(kcal/mol)
GTGTATTTGTTTAATCAATGATATCGGGGTATGGAGAAATTTTCTGCAGATCTTTCCTTGTGCCGCCCCTAGATTTTTTCTTGTGCCTCCCCTGTTTCTTTGATTAAACAGATTAACT Copper-m0028 312
((..((((((((((((((.((((..(((((((((((((((((.(.(((.(........).))).).....))))))))))..))))).))..))))...))))))))))))))..)).
**********TTAATCAATGATATCGGGGTA*************************************************************************************** Copper-m0028-5p 312
----------TTAATCAATGATATCGGGGT---------------------------------------------------------------------------------------- t1382100 1
----------TTAATCAATGATATCGGGGTA--------------------------------------------------------------------------------------- t0000994 308
----------TTAATCAATGATATCGGGGTAT-------------------------------------------------------------------------------------- t0125812 3
//
novel_mir_28
Copper-m0029 CL8167.Contig2_All:134:438:- 305(nt) -94.60(kcal/mol)
GTTTACAGGTGTGCTCTCCCTCTTCGTCAAGGTGGATTTAGTTCTTGGTTCGAGCCTTGTTGTCTGTCATGTTAGCAGCAGAACGGACGATTCGTGTAATGGATTCTACAGAGTTGGGATAGATGTAGTTTTGTTGTTGTAAATTACATCCCTGATAGGTCTGGCCCAGAAGTTTGGGTTACACAAGCTGGCGAGACCACAAGCATTTGTATTATTGAATTTGCGTTGGTCAAATTAAAGAAAAATGTTTTAGGGGCTGTGTCATGTTCATTGAGATGGAGGGGATGCGGGGGTTTCCTCGAGCC Copper-m0029 107
((((..(((...((((((((((((((((..(((((((.((((((((((..((.(((..(((((((((..(((.....)))..)))))))))..((((((.........((((((..((...((((((((((.........))))))))))))..))...)))).(((((....))))))))))).....)))..(((((...(((....((....))....)))..)))))..............))..))))))))))......)))))))..))))))))))....))))))..))).)))).
**********GTGCTCTCCCTCTTCGTCAAG********************************************************************************************************************************************************************************************************************************************************************************** Copper-m0029-5p 106
------AGGTGTGCTCTCCCTCTTCGTCA----------------------------------------------------------------------------------------------------------------------------------------------------------------------------------------------------------------------------------
---------TGTGCTCTCCCTCTTCGTCAA---------------------------------------------------------------------------------------------------------------------------------------------------------------------------------------------------------------------------------
---------TGTGCTCTCCCTCTTCGTCAAG--------------------------------------------------------------------------------------------------------------------------------------------------------------------------------------------------------------------------------
----------GTGCTCTCCCTCTTCGTCA----------------------------------------------------------------------------------------------------------------------------------------------------------------------------------------------------------------------------------
----------GTGCTCTCCCTCTTCGTCAA---------------------------------------------------------------------------------------------------------------------------------------------------------------------------------------------------------------------------------
----------GTGCTCTCCCTCTTCGTCAAG--------------------------------------------------------------------------------------------------------------------------------------------------------------------------------------------------------------------------------
-----------TGCTCTCCCTCTTCGTCAAG--------------------------------------------------------------------------------------------------------------------------------------------------------------------------------------------------------------------------------
//
novel_mir_28
Copper-m0030 CL8167.Contig3_All:134:265:- 132(nt) -48.80(kcal/mol)
GTTTACAGGTGTGCTCTCCCTCTTCGTCAAGGTGGATTTAGTTCTTGGTTCGAGCCTTGTTGTCTGTCATGTTAGCAGCAGGGCTGCGTCATGTTCATTGAGATGGAGGGGATGCGGGGGTTTCCTCGAGCC Copper-m0030 107
((((..(((...((((((((((((((((..(((((((........(((..(.((((((((((.(((......))))))))))))))..))).)))))))..))))))))))....))))))..))).)))).
**********GTGCTCTCCCTCTTCGTCAAG***************************************************************************************************** Copper-m0030-5p 106
------AGGTGTGCTCTCCCTCTTCGTCA------------------------------------------------------------------------------------------------------- t2005401 1
---------TGTGCTCTCCCTCTTCGTCAA------------------------------------------------------------------------------------------------------ t0054735 7
---------TGTGCTCTCCCTCTTCGTCAAG----------------------------------------------------------------------------------------------------- t1128538 1
----------GTGCTCTCCCTCTTCGTCA------------------------------------------------------------------------------------------------------- t2387967 1
----------GTGCTCTCCCTCTTCGTCAA------------------------------------------------------------------------------------------------------ t1111139 1
----------GTGCTCTCCCTCTTCGTCAAG----------------------------------------------------------------------------------------------------- t0003741 95
-----------TGCTCTCCCTCTTCGTCAAG----------------------------------------------------------------------------------------------------- t1591833 1
//
novel_mir_13
Copper-m0031 Unigene11764_All:73:181:+ 109(nt) -52.90(kcal/mol)
GTGACGGAAGAGAGTGACAGAAGAGAGTGGGCACATTCGGGCAATTGTATAAGACGAGTATACCTTTGCAGGTGCGTGCCCACTTGTCTTTCTGTCACGCTTCCGGTTC Copper-m0031 8
....((((((...((((((((((.((((((((((..((..((((..(((((.......)))))..)))).))...))))))))))...)))))))))).))))))....
*****************************************************************************GCCCACTTGTCTTTCTGTCACG********** Copper-m0031-3p 8
-----------------------------------------------------------------------------GCCCACTTGTCTTTCTGTCACG---------- t0049996 8
//
novel_mir_14
Copper-m0032 Unigene11849_All:161:265:+ 105(nt) -28.10(kcal/mol)
CGAGCGGTTAATGGGGACGGACTGTAAATTCGTTGGCAATATGTCTACGCTGGTTCAAATCCAGCTCGGCCCAAAAAAATTTGCAGACTCGCCATGAAATGATAT Copper-m0032 23
....((....((((.((.(..(((((((((..((((......(((...(((((.......)))))..)))))))...))))))))).))).))))....))....
***************************************************************************AAAATTTGCAGACTCGCCAT********** Copper-m0032-3p 23
------------------------------------------------------------------------AAAAAAATTTGCAGACTCGCCA----------- t0981436 1
------------------------------------------------------------------------AAAAAAATTTGCAGACTCGCCAT---------- t1112747 1
-------------------------------------------------------------------------AAAAAATTTGCAGACTCGCCA----------- t2520410 1
-------------------------------------------------------------------------AAAAAATTTGCAGACTCGCCAT---------- t0347343 2
--------------------------------------------------------------------------AAAAATTTGCAGACTCGCC------------ t0837140 1
--------------------------------------------------------------------------AAAAATTTGCAGACTCGCCAT---------- t0326096 2
--------------------------------------------------------------------------AAAAATTTGCAGACTCGCCATG--------- t0317348 2
--------------------------------------------------------------------------AAAAATTTGCAGACTCGCCATGAA------- t0719498 1
---------------------------------------------------------------------------AAAATTTGCAGACTCGCCA----------- t0082496 5
---------------------------------------------------------------------------AAAATTTGCAGACTCGCCAT---------- t0076467 5
---------------------------------------------------------------------------AAAATTTGCAGACTCGCCATG--------- t0759939 1
---------------------------------------------------------------------------AAAATTTGCAGACTCGCCATGA-------- t1225052 1
//
novel_mir_29
Copper-m0033 Unigene13871_All:2452:2535:+ 84(nt) -35.70(kcal/mol)
CAATCATAGAGGGGCCCTTTACCATTCTGTATAAATGAGCTATTCTATTTGTACAGATATGGTAGGGGGCACATTCAATCCTTG Copper-m0033 10
........(((..((((((((((((((((((((((((........)))))))))))).))))))))))))...)))........
****************************************************ACAGATATGGTAGGGGGCACAT********** Copper-m0033-3p 9
------------------TTACCATTCTGTATAAATGAG--------------------------------------------- t1697750 1
---------------------------------------------------TACAGATATGGTAGGGGGCACA----------- t1378337 1
----------------------------------------------------ACAGATATGGTAGGGGGCA------------- t1366085 1
----------------------------------------------------ACAGATATGGTAGGGGGCACA----------- t2513661 1
----------------------------------------------------ACAGATATGGTAGGGGGCACAT---------- t0079145 5
----------------------------------------------------ACAGATATGGTAGGGGGCACATT--------- t0811084 1
//
novel_mir_15
Copper-m0034 Unigene14423_All:338:434:+ 97(nt) -50.90(kcal/mol)
TTTCAATGAGGTGCCCTTTTCCAAGTCTCATACGGCTCAGACTGTCACAAATGATGGAAATCACCGTATGAGACTTGGACGAGGCACCTCCTTGCAA Copper-m0034 66981
...(((.((((((((.((.((((((((((((((((......((((((....))))))......)))))))))))))))).)))))))))).)))...
************GCCCTTTTCCAAGTCTCATACG*************************************************************** Copper-m0034-5p 24
******************************************************************TATGAGACTTGGACGAGGCAC********** Copper-m0034-3p 66943
---CAATGAGGTGCCCTTTTCCAA------------------------------------------------------------------------- t1204909 1
-----------TGCCCTTTTCCAAGTCTCATA----------------------------------------------------------------- t0990724 1
------------GCCCTTTTCCAAGTCTCATAC---------------------------------------------------------------- t0136752 3
------------GCCCTTTTCCAAGTCTCATACG--------------------------------------------------------------- t0078541 5
------------GCCCTTTTCCAAGTCTCATACGG-------------------------------------------------------------- t1305324 1
-------------CCCTTTTCCAAGTCTCATACGG-------------------------------------------------------------- t0040770 10
--------------CCTTTTCCAAGTCTCATACGG-------------------------------------------------------------- t0109527 4
---------------------------------------------------------------CCGTATGAGACTTGGACGAGGCAC---------- t0265327 2
----------------------------------------------------------------CGTATGAGACTTGGACGAGGC------------ t0008853 43
----------------------------------------------------------------CGTATGAGACTTGGACGAGGCA----------- t0072826 6
----------------------------------------------------------------CGTATGAGACTTGGACGAGGCAC---------- t0021470 18
-----------------------------------------------------------------GTATGAGACTTGGACGAGGC------------ t0962827 1
-----------------------------------------------------------------GTATGAGACTTGGACGAGGCA----------- t0000536 508
-----------------------------------------------------------------GTATGAGACTTGGACGAGGCAC---------- t0035940 11
------------------------------------------------------------------TATGAGACTTGGACGAGGC------------ t0094880 4
------------------------------------------------------------------TATGAGACTTGGACGAGGCA----------- t0002780 126
------------------------------------------------------------------TATGAGACTTGGACGAGGCAC---------- t0000003 47703
------------------------------------------------------------------TATGAGACTTGGACGAGGCACC--------- t0038707 10
-------------------------------------------------------------------ATGAGACTTGGACGAGGC------------ t0217613 2
-------------------------------------------------------------------ATGAGACTTGGACGAGGCA----------- t0001029 302
-------------------------------------------------------------------ATGAGACTTGGACGAGGCAC---------- t0000009 17143
-------------------------------------------------------------------ATGAGACTTGGACGAGGCACC--------- t0000237 980
-------------------------------------------------------------------ATGAGACTTGGACGAGGCACCT-------- t0078241 5
--------------------------------------------------------------------TGAGACTTGGACGAGGCA----------- t1880684 1
--------------------------------------------------------------------TGAGACTTGGACGAGGCAC---------- t0022991 17
--------------------------------------------------------------------TGAGACTTGGACGAGGCACC--------- t0006568 56
---------------------------------------------------------------------GAGACTTGGACGAGGCAC---------- t0103065 4
---------------------------------------------------------------------GAGACTTGGACGAGGCACC--------- t1674952 1
----------------------------------------------------------------------AGACTTGGACGAGGCACCTCC------ t0040344 10
-----------------------------------------------------------------------GACTTGGACGAGGCACCTCC------ t0930871 1
---------------------------------------------------------------------------TGGACGAGGCACCTCCTTGCA- t0215767 2
//
novel_mir_17
Copper-m0035 Unigene16293_All:53:170:+ 118(nt) -53.60(kcal/mol)
GAGCTCTTCTGGGCGTTATAGGTATGGATGGATTGGGGAGAAAAACTCTTTTCAAGTATGAGTATGAATGAATTTCTTCCCAAGGCCGCCCATACCGGTGATGTCCAGATGGTCCTCC Copper-m0035 541
(((..((((((((((((((.(((((((.(((.(((((((((((.(.((..((((....))))...)).)...)))))))))))..))).))))))).)))))))))))).))..))).
********************GGTATGGATGGATTGGGGAGA***************************************************************************** Copper-m0035-5p 409
****************************************************************************TTCCCAAGGCCGCCCATACCGG******************** Copper-m0035-3p 121
-----CTTCTGGGCGTTATAGGTATG-------------------------------------------------------------------------------------------- t0069055 6
-------------------AGGTATGGATGGATTGGGGAGA----------------------------------------------------------------------------- t2541019 1
--------------------GGTATGGATGGATTGGGGA------------------------------------------------------------------------------- t0112429 4
--------------------GGTATGGATGGATTGGGGAG------------------------------------------------------------------------------ t0095593 4
--------------------GGTATGGATGGATTGGGGAGA----------------------------------------------------------------------------- t0000780 377
--------------------GGTATGGATGGATTGGGGAGAA---------------------------------------------------------------------------- t0087570 5
--------------------GGTATGGATGGATTGGGGAGAAA--------------------------------------------------------------------------- t1024954 1
----------------------TATGGATGGATTGGGGAGAAA--------------------------------------------------------------------------- t0023037 17
--------------------------------------------------------------------------TCTTCCCAAGGCCGCCCATACC---------------------- t1575097 1
----------------------------------------------------------------------------TTCCCAAGGCCGCCCATACCG--------------------- t0274536 2
----------------------------------------------------------------------------TTCCCAAGGCCGCCCATACCGG-------------------- t0003016 117
-----------------------------------------------------------------------------TCCCAAGGCCGCCCATACCGG-------------------- t2027421 1
-------------------------------------------------------------------------------------------ATACCGGTGATGTCCAGATGG------ t0296471 2
--------------------------------------------------------------------------------------------TACCGGTGATGTCCAGATGGT----- t0129527 3
//
novel_mir_18
Copper-m0036 Unigene17397_All:521:658:+ 138(nt) -86.80(kcal/mol)
TTGGAGATGGAGGGAGCCTTCTTTGGGTTGCGACCTAGTTTGCCCCAGCAAATATCTGTCCAAACCATTTTTGCTTCGTGTGCACAGATATTTGCCCGTGCAAACTGGGTCGCAACCCAAAGAAGGCTCTCCCACCAC Copper-m0036 6
.(((...(((.((((((((((((((((((((((((((((((((.(..((((((((((((.((.((.(........).)).)).))))))))))))..).)))))))))))))))))))))))))))))))))))))).
***********************************************************************************************************GGTCGCAACCCAAAGAAGGCT********** Copper-m0036-3p 6
-----------------------------------------------------------------------------------------------------------GGTCGCAACCCAAAGAAGGCT---------- t0086548 5
-------------------------------------------------------------------------------------------------------------TCGCAACCCAAAGAAGGCTC--------- t2105822 1
//
novel_mir_30
Copper-m0037 Unigene17744_All:1:333:- 333(nt) -71.34(kcal/mol)
AAACTGCCCTTCACATTGACCGTGTCGGATGATCTCAGGAACACACCAGATCTAGTGGAAGAAGAGCTTTCCAGCACATTTTCATAGTTCACAGATCAATTTTGAACCTTAGCTTTTGATTATTCTCACAGCCCTCTTTTACATCTCCATCTGGTTGTGCGAGTACCAATATGATATATAGTCCTTCAAATGCTCATAACGGAAGATTTGTACCTCCAAGATTGAATGTCTTTCATTGGCTCACAACTTCAAGCACTAAAAGAGTAGGAAAAAGATTTAGAAAACCCGGGCTGCAGATCGAACTTTGAGATTTCGGGAGAAAGGAATAAGTTA Copper-m0037 7
.((((..((..(((.......)))..)).((((((...((((.(((........)))(((((.(.(((....))).).)))))...))))..))))))........((((..(((((((....(((((((((((..(((((.((((((.(((....(((((((((.......(((.....))).......)))))......((((..((((....((((((..(.....)..)).))))...))))))))..))))....)))...)))....))).))))).....))))))............)))))..))))))).))))....)))).
****************************************************************************************************************************************************************************************************************************************************************************************************************TTGAGATTTCGGGAGAAAGGA******** Copper-m0037-3p 7
---------------------------------------------------------------------------------------------------------------------------------------------------------------------------------------------------------------------------------------------------------------
//
novel_mir_19
Copper-m0038 Unigene203_All:104:181:- 78(nt) -21.90(kcal/mol)
AATCGGTTTGTAGAAACTGGCAAACGAGGACAAGGATTCCAATTAGGTTTTTGTGGCCAGTAGCTTCGAAACATGGGA Copper-m0038 138
..(((.((((.((..((((((..((((((((...(((....)))..)))))))).))))))..)).))))...)))..
**********TAGAAACTGGCAAACGAGGACA********************************************** Copper-m0038-5p 134
--------TGTAGAAACTGGCAAACGAGGA------------------------------------------------ t1695191 1
--------TGTAGAAACTGGCAAACGAGGACAA--------------------------------------------- t0313026 2
----------TAGAAACTGGCAAACGAGGAC----------------------------------------------- t0050436 8
----------TAGAAACTGGCAAACGAGGACA---------------------------------------------- t0003073 114
----------TAGAAACTGGCAAACGAGGACAA--------------------------------------------- t1219966 1
-----------AGAAACTGGCAAACGAGGACA---------------------------------------------- t0357385 2
-----------AGAAACTGGCAAACGAGGACAA--------------------------------------------- t0301276 2
-------------AAACTGGCAAACGAGGACAA--------------------------------------------- t0288375 2
-------------AAACTGGCAAACGAGGACAAG-------------------------------------------- t2096146 1
-------------AAACTGGCAAACGAGGACAAGG------------------------------------------- t2085271 1
--------------AACTGGCAAACGAGGACAAGGATT---------------------------------------- t1549969 1
----------------CTGGCAAACGAGGACAAGGATT---------------------------------------- t0697343 1
-----------------------------ACAAGGATTCCAATTAGGTTT---------------------------- t0227875 2
//
novel_mir_31
Copper-m0039 Unigene20631_All:387:497:+ 111(nt) -52.20(kcal/mol)
ATCTTCACGGCATGTGCCGCAAAGGATCAAAAGGGCTATTGATACGCAACTTGGGCATCGAATTGCAAACCATAGGCCTATTGATTGTTTGCGGCCCCAGGCCGTGAAGCG Copper-m0039 5
..(((((((((.((.((((((((.((((((.(((.((((.(....((((.(((.....))).))))...).)))).))).)))))).))))))))..)).)))))))))..
*******************************************************************************ATTGATTGTTTGCGGCCCCAGG********** Copper-m0039-3p 5
-------------------------------------------------------------------------------ATTGATTGTTTGCGGCCCCAG----------- t1916502 1
-------------------------------------------------------------------------------ATTGATTGTTTGCGGCCCCAGG---------- t0105095 4
//
novel_mir_32
Copper-m0040 Unigene22205_All:72:165:+ 94(nt) -42.00(kcal/mol)
AAACCAAACAATTTGGATGGAATATTATTACTGGGAATAATAATACCAGGATTATTATTCCTGGTAATAATATTCCATTCAAAATAATTCACGA Copper-m0040 12
...........((((((((((((((((((((..(((((((((((......)))))))))))..))))))))))))))))))))...........
**********ATTTGGATGGAATATTATTAC*************************************************************** Copper-m0040-5p 12
----------ATTTGGATGGAATATTATTAC--------------------------------------------------------------- t0034605 11
-------------TGGATGGAATATTATTACTGG------------------------------------------------------------ t1507000 1
//
novel_mir_33
Copper-m0041 Unigene22376_All:79:180:- 102(nt) -70.20(kcal/mol)
TTCTGCCATTGATGCTTCTGGCCTGATCTTAGCCGTCGATGGTGCCCCTGAACTGGGACATCATCGGTGGCTACAATCACGCCAGGAGCATCAATGGCGTCA Copper-m0041 10
....((((((((((((((((((.((((..(((((..((((((((.(((......))).))))))))..)))))..)))).))))))))))))))))))....
***********************************************************************TACAATCACGCCAGGAGCATC********** Copper-m0041-3p 9
----------------------------------------------------------------------CTACAATCACGCCAGGAGCAT----------- t0288581 2
-----------------------------------------------------------------------TACAATCACGCCAGGAGCATC---------- t0057128 7
-----------------------------------------------------------------------------CACGCCAGGAGCATCAATGGC---- t2087221 1
//
novel_mir_1
Copper-m0042 Unigene29652_All:857:1041:- 185(nt) -69.90(kcal/mol)
AAAAGCCTAATAACCAGACACCCTTCCTTCTGCTAGAATGAAACCAGAACCAAATACCCAGATCCGACCCTAGATTCTAAATCCATACCACTGATGAAACATACAGATCATAATGAAATATCATATTTCTTGTTTCACAATTTTTGACAAGAGCAGAGGGAAGGGTGTCTGGTTATTAGGCAGAA Copper-m0042 49
....((((((((((((((((((((((((((((((....((((((.((((..........(((..(.......)..)))............((((((...))).)))......((((....))))..)))).))))))((.....)).....))))))))))))))))))))))))))))))....
**********************************************************************************************************************************************************AGAGGGAAGGGTGTCTGGTTA********** Copper-m0042-3p 48
----------------------------------------------------------------------------------------------------------------------------------------------------------AGAGGGAAGGGTGTCTGGTTA---------- t0007988 47
----------------------------------------------------------------------------------------------------------------------------------------------------------AGAGGGAAGGGTGTCTGGTTAT--------- t0463134 1
----------------------------------------------------------------------------------------------------------------------------------------------------------------AAGGGTGTCTGGTTATTAGGC---- t1338890 1
//
novel_mir_1
Copper-m0043 Unigene29653_All:531:715:- 185(nt) -69.90(kcal/mol)
AAAAGCCTAATAACCAGACACCCTTCCTTCTGCTAGAATGAAACCAGAACCAAATACCCAGATCCGACCCTAGATTCTAAATCCATACCACTGATGAAACATACAGATCATAATGAAATATCATATTTCTTGTTTCACAATTTTTGACAAGAGCAGAGGGAAGGGTGTCTGGTTATTAGGCAGAA Copper-m0043 49
....((((((((((((((((((((((((((((((....((((((.((((..........(((..(.......)..)))............((((((...))).)))......((((....))))..)))).))))))((.....)).....))))))))))))))))))))))))))))))....
**********************************************************************************************************************************************************AGAGGGAAGGGTGTCTGGTTA********** Copper-m0043-3p 48
----------------------------------------------------------------------------------------------------------------------------------------------------------AGAGGGAAGGGTGTCTGGTTA---------- t0007988 47
----------------------------------------------------------------------------------------------------------------------------------------------------------AGAGGGAAGGGTGTCTGGTTAT--------- t0463134 1
----------------------------------------------------------------------------------------------------------------------------------------------------------------AAGGGTGTCTGGTTATTAGGC---- t1338890 1
//
novel_mir_8
Copper-m0044 Unigene30240_All:3:127:- 125(nt) -39.76(kcal/mol)
ATTACAAATTCTTGACAGGATCGGTCACGGGCAGGTCAGAAGGCAACCGGCTCTTCATTCTGATCGAAGAGAAGCTCTTCCTTCGCGGCAGTGGCAGTGGCCAGGTCCTCTTTTGACATAACAAC Copper-m0044 119
.........((..((.((((((((((((.(.((.(((.(((((.......((((((.........))))))........)))))..)))..)).).)))))).)))))).))..)).........
**********CTTGACAGGATCGGTCACGGG********************************************************************************************** Copper-m0044-5p 116
----------CTTGACAGGATCGGTCACGGG---------------------------------------------------------------------------------------------- t0003115 113
----------CTTGACAGGATCGGTCACGGGCA-------------------------------------------------------------------------------------------- t2201811 1
-----------TTGACAGGATCGGTCACGGGCA-------------------------------------------------------------------------------------------- t1126866 1
-------------GACAGGATCGGTCACGGGCAG------------------------------------------------------------------------------------------- t1012454 1
-------------------------------CAGGTCAGAAGGCAACCGGCT------------------------------------------------------------------------- t0358427 2
---------------------------------------------------------------------------TCTTCCTTCGCGGCAGTGGCA----------------------------- t0562775 1
//
novel_mir_8
Copper-m0045 Unigene30241_All:3:127:- 125(nt) -39.76(kcal/mol)
ATTACAAATTCTTGACAGGATCGGTCACGGGCAGGTCAGAAGGCAACCGGCTCTTCATTCTGATCGAAGAGAAGCTCTTCCTTCGCGGCAGTGGCAGTGGCCAGGTCCTCTTTTGACATAACAAC Copper-m0045 119
.........((..((.((((((((((((.(.((.(((.(((((.......((((((.........))))))........)))))..)))..)).).)))))).)))))).))..)).........
**********CTTGACAGGATCGGTCACGGG********************************************************************************************** Copper-m0045-5p 116
----------CTTGACAGGATCGGTCACGGG---------------------------------------------------------------------------------------------- t0003115 113
----------CTTGACAGGATCGGTCACGGGCA-------------------------------------------------------------------------------------------- t2201811 1
-----------TTGACAGGATCGGTCACGGGCA-------------------------------------------------------------------------------------------- t1126866 1
-------------GACAGGATCGGTCACGGGCAG------------------------------------------------------------------------------------------- t1012454 1
-------------------------------CAGGTCAGAAGGCAACCGGCT------------------------------------------------------------------------- t0358427 2
---------------------------------------------------------------------------TCTTCCTTCGCGGCAGTGGCA----------------------------- t0562775 1
//
novel_mir_21
Copper-m0046 Unigene32489_All:122:215:- 94(nt) -38.00(kcal/mol)
CTCGAAATCTTTGGGCGTTAAAGGCTAGGAAAGACTAGTAGATCTGTTGTTGCAATTTTGTCTTTCCTATGCTTTTATGGCCTATTGTTTTCGA Copper-m0046 16
.((((((.(..(((((..(((((((((((((((((....((((.(((....))))))).)))))))))).)))))))..)))))..).))))))
**************************************************************TTTCCTATGCTTTTATGGCCTA********** Copper-m0046-3p 16
------------------------------------------------------------TCTTTCCTATGCTTTTATGGCC------------ t0689512 1
--------------------------------------------------------------TTTCCTATGCTTTTATGGCCT----------- t1693849 1
--------------------------------------------------------------TTTCCTATGCTTTTATGGCCTA---------- t0027967 14
//
novel_mir_1
Copper-m0047 Unigene40671_All:1342:1526:- 185(nt) -69.90(kcal/mol)
AAAAGCCTAATAACCAGACACCCTTCCTTCTGCTAGAATGAAACCAGAACCAAATACCCAGATCCGACCCTAGATTCTAAATCCATACCACTGATGAAACATACAGATCATAATGAAATATCATATTTCTTGTTTCACAATTTTTGACAAGAGCAGAGGGAAGGGTGTCTGGTTATTAGGCAGAA Copper-m0047 49
....((((((((((((((((((((((((((((((....((((((.((((..........(((..(.......)..)))............((((((...))).)))......((((....))))..)))).))))))((.....)).....))))))))))))))))))))))))))))))....
**********************************************************************************************************************************************************AGAGGGAAGGGTGTCTGGTTA********** Copper-m0047-3p 48
----------------------------------------------------------------------------------------------------------------------------------------------------------AGAGGGAAGGGTGTCTGGTTA---------- t0007988 47
----------------------------------------------------------------------------------------------------------------------------------------------------------AGAGGGAAGGGTGTCTGGTTAT--------- t0463134 1
----------------------------------------------------------------------------------------------------------------------------------------------------------------AAGGGTGTCTGGTTATTAGGC---- t1338890 1
//
novel_mir_8
Copper-m0048 Unigene40730_All:1:121:- 121(nt) -39.76(kcal/mol)
ATTACAAATTCTTGACAGGATCGGTCACGGGCAGGTCAGAAGGCAACCGGCTCTTCATTCTGATCGAAGAGAAGCTCTTCCTTCGCGGCAGTGGCAGTGGCCAGGTCCTCTTTTGACATAA Copper-m0048 119
.........((..((.((((((((((((.(.((.(((.(((((.......((((((.........))))))........)))))..)))..)).).)))))).)))))).))..)).....
**********CTTGACAGGATCGGTCACGGG****************************************************************************************** Copper-m0048-5p 116
----------CTTGACAGGATCGGTCACGGG------------------------------------------------------------------------------------------ t0003115 113
----------CTTGACAGGATCGGTCACGGGCA---------------------------------------------------------------------------------------- t2201811 1
-----------TTGACAGGATCGGTCACGGGCA---------------------------------------------------------------------------------------- t1126866 1
-------------GACAGGATCGGTCACGGGCAG--------------------------------------------------------------------------------------- t1012454 1
-------------------------------CAGGTCAGAAGGCAACCGGCT--------------------------------------------------------------------- t0358427 2
---------------------------------------------------------------------------TCTTCCTTCGCGGCAGTGGCA------------------------- t0562775 1
//
novel_mir_8
Copper-m0049 Unigene40733_All:1:121:- 121(nt) -39.76(kcal/mol)
ATTACAAATTCTTGACAGGATCGGTCACGGGCAGGTCAGAAGGCAACCGGCTCTTCATTCTGATCGAAGAGAAGCTCTTCCTTCGCGGCAGTGGCAGTGGCCAGGTCCTCTTTTGACATAA Copper-m0049 119
.........((..((.((((((((((((.(.((.(((.(((((.......((((((.........))))))........)))))..)))..)).).)))))).)))))).))..)).....
**********CTTGACAGGATCGGTCACGGG****************************************************************************************** Copper-m0049-5p 116
----------CTTGACAGGATCGGTCACGGG------------------------------------------------------------------------------------------ t0003115 113
----------CTTGACAGGATCGGTCACGGGCA---------------------------------------------------------------------------------------- t2201811 1
-----------TTGACAGGATCGGTCACGGGCA---------------------------------------------------------------------------------------- t1126866 1
-------------GACAGGATCGGTCACGGGCAG--------------------------------------------------------------------------------------- t1012454 1
-------------------------------CAGGTCAGAAGGCAACCGGCT--------------------------------------------------------------------- t0358427 2
---------------------------------------------------------------------------TCTTCCTTCGCGGCAGTGGCA------------------------- t0562775 1
//
novel_mir_1
Copper-m0050 Unigene45219_All:418:602:- 185(nt) -69.90(kcal/mol)
AAAAGCCTAATAACCAGACACCCTTCCTTCTGCTAGAATGAAACCAGAACCAAATACCCAGATCCGACCCTAGATTCTAAATCCATACCACTGATGAAACATACAGATCATAATGAAATATCATATTTCTTGTTTCACAATTTTTGACAAGAGCAGAGGGAAGGGTGTCTGGTTATTAGGCAGAA Copper-m0050 49
....((((((((((((((((((((((((((((((....((((((.((((..........(((..(.......)..)))............((((((...))).)))......((((....))))..)))).))))))((.....)).....))))))))))))))))))))))))))))))....
**********************************************************************************************************************************************************AGAGGGAAGGGTGTCTGGTTA********** Copper-m0050-3p 48
----------------------------------------------------------------------------------------------------------------------------------------------------------AGAGGGAAGGGTGTCTGGTTA---------- t0007988 47
----------------------------------------------------------------------------------------------------------------------------------------------------------AGAGGGAAGGGTGTCTGGTTAT--------- t0463134 1
----------------------------------------------------------------------------------------------------------------------------------------------------------------AAGGGTGTCTGGTTATTAGGC---- t1338890 1
//
novel_mir_27
Copper-m0051 Unigene45237_All:1:295:- 295(nt) -88.13(kcal/mol)
GATGTTCATATTGAACACAGATGCTCTATCCATTATAATACTCCAGATGCTCCAAATGGTAGGTTGGAGCCATCTTTATTGCCCTTTTTCCTTGACTCAGCCAGGACAACAATAAAGATTCAGCCACACTCTCGGTCGAATTAAGTTTTTTCTGACCGTCAAATCTATAGGCATAGTTTTTTACGAATTCTCTGTCATTTTCCCTCAAAACCTTCGCTCAAAACCCACCCAACTGTGAAGTTAGCATGACCATCTGGAGTATCATAATGAGTATTATATTGGATTGATGCATCTG Copper-m0051 28
..(((((.....)))))(((((((((.(((((.((((((((((..(((((((((.(((((.(((((((....(((((((((....((.((((.(......).)))).)))))))))))))))))).......((((((((.........))).)))))...........((((.((..(((...)))..)).))))...............((((((.................))))))........))))).))))))))).....)))))))))).))))).)).)))))))
********************ATGCTCTATCCATTATAATAC************************************************************************************************************************************************************************************************************************************************************** Copper-m0051-5p 11
*******************************************************************************************************************************************************************************************************************************************************************************TATTATATTGGATTGATGCATC** Copper-m0051-3p 17
--------------------ATGCTCTATCCATTATAATAC----------------------------------------------------------------------------------------------------------------------------------------------------------------------------------------------------------------------
---------------------------------------------------------------------------------------------------------------------------------------------------------------------------------------------------------------------------------------------------------------
---------------------------------------------------------------------------------------------------------------------------------------------------------------------------------------------------------------------------------------------------------------
---------------------------------------------------------------------------------------------------------------------------------------------------------------------------------------------------------------------------------------------------------------
---------------------------------------------------------------------------------------------------------------------------------------------------------------------------------------------------------------------------------------------------------------
---------------------------------------------------------------------------------------------------------------------------------------------------------------------------------------------------------------------------------------------------------------
---------------------------------------------------------------------------------------------------------------------------------------------------------------------------------------------------------------------------------------------------------------
//
novel_mir_34
Copper-m0052 Unigene7564_All:108:189:+ 82(nt) -35.40(kcal/mol)
GAGATTTGAATTACCAACCGATCAAATCAATTCTTGTGTTAGCAACACAGAATTGATTTGATCTCTTGGTAATACAAGATTT Copper-m0052 15
....((((.((((((((..(((((((((((((((.((((.....)))))))))))))))))))..)))))))).))))....
***************************************************ATTGATTTGATCTCTTGGTAA********** Copper-m0052-3p 14
-----TTGAATTACCAACCGATCAAA-------------------------------------------------------- t1502000 1
------------------------------------------------AGAATTGATTTGATCTCTTGG------------- t0316965 2
------------------------------------------------AGAATTGATTTGATCTCTTGGT------------ t1349944 1
------------------------------------------------AGAATTGATTTGATCTCTTGGTAA---------- t0579351 1
---------------------------------------------------ATTGATTTGATCTCTTGGTAA---------- t0037914 10
//
